# Supplementary material for: Synthesis and structural characterization of copper–cuprizone complexes
Source: Royal Society of Chemistry journal article supplement (doi:10.1039/d2dt01475k), 2022-01-01
Supplement: d2dt01475k1.pdf [file d2dt01475k1.pdf]

Supporting Information for

# Synthesis and structural characterization of copper-cuprizonone complexes

M. Jake Pushie,<sup>a\*</sup> Kelly L. Summers,<sup>b,c</sup> Kurt H. Nienaber,<sup>b</sup> Ingrid J. Pickering,<sup>b,c</sup> and Graham N. George<sup>b,c</sup>

<sup>a</sup> Department of Surgery, College of Medicine, University of Saskatchewan, SK, S7N 5E5  
Canada

<sup>b</sup> Molecular and Environmental Sciences Research Group, Department of Geological Sciences,  
University of Saskatchewan, SK, S7N 5E2 Canada

<sup>c</sup> Department of Chemistry, University of Saskatchewan, SK, S7N 5C9 Canada

\* Corresponding Author: [jake.pushie@usask.ca](mailto:jake.pushie@usask.ca)

**Table S1.** Assignment of ions as well as the product ions and neutral losses generated by collision-induced dissociation of  $[\text{Cu}^{\text{III}}(\text{CPZmh}_2)_{-4}\text{H}]$ . Colours correspond to the fragmentation pathway colour scheme in Figure S2.

| annotation                                                           | Assignment                                                                             | neutral losses                                            | Th. $m/z$    | Obs $m/z$    |
|----------------------------------------------------------------------|----------------------------------------------------------------------------------------|-----------------------------------------------------------|--------------|--------------|
| <i>Positive Ion Mode MS/MS</i>                                       |                                                                                        |                                                           |              |              |
| $[(^{63}\text{Cu}^{\text{III}})\text{M}+2\text{Na}]^+$               | $^{63}\text{Cu}^{\text{III}}\text{C}_{16}\text{H}_{24}\text{N}_8\text{O}_4\text{Na}_2$ | –                                                         | <b>501.1</b> | <b>501.1</b> |
|                                                                      | $^{63}\text{Cu}^{\text{III}}\text{C}_{12}\text{H}_{13}\text{N}_7\text{O}_4\text{Na}_2$ | 501 – $\text{C}_4\text{H}_{11}\text{N}$                   | 428.0        | 428.0        |
|                                                                      | $^{63}\text{Cu}^{\text{III}}\text{C}_{10}\text{H}_{12}\text{N}_8\text{O}_4\text{Na}_2$ | 501 – $\text{C}_6\text{H}_{12}$                           | 417.0        | 417.3        |
|                                                                      | 385 $m/z$ + $\text{H}_2\text{O}$ capture                                               | –                                                         | –            | 403.3        |
|                                                                      | $^{63}\text{Cu}^{\text{III}}\text{C}_9\text{H}_6\text{N}_7\text{O}_4\text{Na}_2$       | 428 – $\text{C}_3\text{H}_7$                              | 385.0        | 385.1        |
|                                                                      | $^{63}\text{Cu}^{\text{III}}\text{C}_9\text{H}_{13}\text{N}_5\text{O}_3\text{Na}_2$    | 501 – $\text{C}_7\text{H}_{11}\text{N}_3\text{O}$         | 348.0        | 347.9        |
|                                                                      | 305 $m/z$ + $\text{H}_2\text{O}$ capture                                               | –                                                         | –            | 323.2        |
|                                                                      | $^{63}\text{Cu}^{\text{III}}\text{C}_4\text{N}_6\text{O}_4\text{Na}_2$                 | 417 – $\text{C}_6\text{H}_{12}\text{N}_2$                 | 304.9        | 305.1        |
|                                                                      | $^{63}\text{Cu}^{\text{III}}\text{C}_6\text{H}_6\text{N}_5\text{O}_3\text{Na}_2$       | 348 – $\text{C}_3\text{H}_7$                              | 305.0        | 305.1        |
|                                                                      | $^{63}\text{Cu}^{\text{III}}\text{C}_6\text{H}_5\text{N}_4\text{O}_3\text{Na}_2$       | 385 – $\text{C}_3\text{HN}_3\text{O}_2$                   | 290.0        | 289.6        |
|                                                                      | 247 $m/z$ + $\text{H}_2\text{O}$ capture                                               | –                                                         | –            | 265.0        |
|                                                                      | $^{63}\text{Cu}^{\text{III}}\text{C}_4\text{N}_3\text{O}_3\text{Na}_2$                 | 290 – $\text{C}_2\text{H}_5\text{N}$                      | 246.9        | 246.9        |
|                                                                      | $^{63}\text{Cu}^{\text{III}}\text{C}_3\text{H}_3\text{N}_5\text{O}_3\text{Na}$         | 348 – $\text{C}_6\text{H}_{10}\text{Na}$                  | 243.0        | 243.2        |
|                                                                      | $^{63}\text{Cu}^{\text{III}}\text{C}_2\text{N}_2\text{O}_2\text{Na}_2$                 | 385 – $\text{C}_7\text{H}_6\text{N}_5\text{O}_2$          | 192.9        | 193.1        |
|                                                                      | $^{63}\text{Cu}^{\text{III}}\text{C}_2\text{N}_2\text{O}_2\text{Na}_2$                 | 305 – $\text{C}_2\text{N}_4\text{O}_2$                    | 192.9        | 193.1        |
|                                                                      | $^{63}\text{Cu}^{\text{III}}\text{C}_2\text{N}_3\text{O}_1\text{Na}$                   | 247 – $\text{C}_2\text{O}_2\text{Na}$                     | 167.9        | 168.0        |
|                                                                      | $^{63}\text{Cu}^{\text{III}}\text{C}_2\text{N}_3\text{O}_1\text{Na}$                   | 305 – $\text{C}_4\text{H}_6\text{N}_2\text{O}_2\text{Na}$ | 167.9        | 168.0        |
| $^{63}\text{Cu}^{\text{III}}\text{C}_2\text{N}_3\text{O}_1\text{Na}$ | 243 – $\text{CH}_3\text{N}_2\text{O}_2$                                                | 167.9                                                     | 168.0        |              |

**Table S2.** EXAFS multiple scattering parameters of the best-fit models representing the blue and green products arising from the reaction of Cu(II) with cuprizone.<sup>a</sup>

| <i>path</i> <sup>b</sup>                                                                                         | <i>N</i> | <i>R</i> | $\sigma^2$ | $\Delta E_0$ | <i>F</i>      |
|------------------------------------------------------------------------------------------------------------------|----------|----------|------------|--------------|---------------|
| <b>Blue Product:</b> <i>Cu<sup>III</sup>N<sub>4</sub> environment, 12 variables used for EXAFS curve fitting</i> |          |          |            |              |               |
| Cu – N                                                                                                           | 4        | 1.908(2) | 0.0028     | +3.4(2)      | <b>0.3300</b> |
| Cu · C                                                                                                           | 2        | 2.71(6)  | 0.0040     |              |               |
| Cu · C                                                                                                           | 2        | 2.73     | 0.0040     |              |               |
| Cu · C · N                                                                                                       | 4        | 2.93(3)  | 0.0041     |              |               |
| Cu · C · N                                                                                                       | 4        | 2.94     | 0.0041     |              |               |
| Cu · N                                                                                                           | 2        | 2.925(7) | 0.0035     |              |               |
| Cu · N                                                                                                           | 2        | 2.9774   | 0.0035     |              |               |
| Cu · N · N                                                                                                       | 4        | 3.04(4)  | 0.0037     |              |               |
| Cu · N · N                                                                                                       | 4        | 3.08     | 0.0037     |              |               |
| Cu · C                                                                                                           | 2        | 3.19(2)  | 0.0034     |              |               |
| Cu · O                                                                                                           | 2        | 3.86(5)  | 0.0031     |              |               |
| Cu · N · N                                                                                                       | 4        | 3.87     | 0.0055     |              |               |
| Cu · N · Cu · N                                                                                                  | 4        | 3.89     | 0.0055     |              |               |
| Cu · O · C                                                                                                       | 4        | 3.92     | 0.0031     |              |               |
| Cu · O                                                                                                           | 2        | 3.94     | 0.0031     |              |               |
| Cu · C · O · C                                                                                                   | 2        | 3.95     | 0.0035     |              |               |
| Cu · O · C                                                                                                       | 4        | 3.97     | 0.0031     |              |               |
| Cu · C · O · C                                                                                                   | 2        | 3.99     | 0.0033     |              |               |
| Cu · C                                                                                                           | 1        | 4.02     | 0.0034     |              |               |
| Cu · O · N                                                                                                       | 4        | 4.14(4)  | 0.0034     |              |               |
| Cu · O · N                                                                                                       | 4        | 4.16     | 0.0034     |              |               |
| Cu · C · O · N                                                                                                   | 4        | 4.18     | 0.0035     |              |               |
| Cu · C · N                                                                                                       | 4        | 4.18     | 0.0037     |              |               |
| Cu · C · O · N                                                                                                   | 4        | 4.18     | 0.0033     |              |               |
| Cu · N · C · N                                                                                                   | 4        | 4.5(1)   | 0.0042     |              |               |
| Cu · C · O · C · N                                                                                               | 4        | 4.5(2)   | 0.0042     |              |               |

**Green Product:** *Cu<sup>II</sup>N<sub>2</sub>O<sub>2</sub> environment, 11 variables used for EXAFS curve fitting*

|            |   |          |        |         |               |
|------------|---|----------|--------|---------|---------------|
| Cu – N     | 1 | 1.945(8) | 0.0035 | +1.3(4) | <b>0.3384</b> |
| Cu – N     | 1 | 1.963    | 0.0035 |         |               |
| Cu – O     | 1 | 1.977    | 0.0038 |         |               |
| Cu – O     | 1 | 1.980    | 0.0038 |         |               |
| Cu · C     | 1 | 2.70(1)  | 0.0036 |         |               |
| Cu · C     | 1 | 2.73     | 0.0036 |         |               |
| Cu · C     | 1 | 2.87     | 0.0034 |         |               |
| Cu · C     | 1 | 2.87     | 0.0034 |         |               |
| Cu · C · O | 2 | 2.93(2)  | 0.0034 |         |               |
| Cu · C · O | 2 | 2.95     | 0.0034 |         |               |
| Cu · C · N | 2 | 3.01     | 0.0034 |         |               |
| Cu · C · N | 2 | 3.02     | 0.0034 |         |               |

|                 |   |         |        |
|-----------------|---|---------|--------|
| Cu · N          | 1 | 3.03(1) | 0.0035 |
| Cu · N          | 1 | 3.09    | 0.0035 |
| Cu · N · N      | 2 | 3.11    | 0.0033 |
| Cu · N · N      | 2 | 3.17    | 0.0033 |
| Cu · C          | 1 | 3.28(2) | 0.0035 |
| Cu · C          | 1 | 3.44    | 0.0043 |
| Cu · C          | 1 | 3.47    | 0.0043 |
| Cu · C          | 1 | 3.68    | 0.0043 |
| Cu · N · N      | 2 | 3.81(1) | 0.0044 |
| Cu · N          | 1 | 3.85    | 0.0034 |
| Cu · N · Cu · N | 2 | 3.85    | 0.0045 |
| Cu · O          | 1 | 3.87    | 0.0034 |
| Cu · O          | 1 | 3.88    | 0.0034 |
| Cu · O · O      | 2 | 3.93    | 0.0043 |
| Cu · O · Cu · O | 2 | 3.95    | 0.0044 |
| Cu · C · N      | 2 | 3.97    | 0.0035 |
| Cu · O · C      | 2 | 4.00    | 0.0035 |
| Cu · C · N · C  | 1 | 4.00    | 0.0033 |
| Cu · N          | 1 | 4.00    | 0.0033 |
| Cu · O · C      | 2 | 4.01    | 0.0034 |
| Cu · C · N      | 2 | 4.02    | 0.0036 |
| Cu · C · O · C  | 1 | 4.05(1) | 0.0033 |
| Cu · C · N · C  | 1 | 4.06(1) | 0.0032 |
| Cu · C · O · C  | 1 | 4.07    | 0.0030 |
| Cu · N · O      | 2 | 4.13    | 0.0033 |
| Cu · O · N      | 2 | 4.15    | 0.0030 |
| Cu · C · N · O  | 2 | 4.16    | 0.0033 |
| Cu · O · N      | 2 | 4.17    | 0.0030 |
| Cu · N · O      | 2 | 4.17    | 0.0033 |
| Cu · C · O · N  | 2 | 4.17    | 0.0030 |
| Cu · C · N · O  | 2 | 4.19    | 0.0032 |
| Cu · C · O · N  | 2 | 4.20    | 0.0030 |
| Cu · N          | 1 | 4.52(4) | 0.0031 |
| Cu · N · O      | 2 | 4.56    | 0.0032 |
| Cu · N · O      | 2 | 4.62    | 0.0031 |
| Cu · Cu         | 1 | 4.80    | 0.0035 |
| Cu · Cu         | 1 | 4.80    | 0.0035 |
| Cu · Cu · N     | 2 | 4.80    | 0.0038 |
| Cu · Cu · N     | 2 | 4.80    | 0.0038 |
| Cu · C · C      | 2 | 4.87(3) | 0.0036 |
| Cu · C · C      | 2 | 4.90    | 0.0036 |
| Cu · C · C      | 2 | 4.98    | 0.0036 |

- a. Coordination numbers  $N$ , interatomic distances  $R$  (Å), Debye-Waller factors (the mean-square deviations in interatomic distance)  $\sigma^2$  (Å<sup>2</sup>), and threshold energy shifts  $\Delta E_0$  (eV). The values in parentheses are the estimated standard deviations in the last digit obtained from the diagonal elements of the covariance matrix. The fit-error function  $F$  is defined by

$$F = \sqrt{\sum k^6 (\chi(k)_{\text{calcd}} - \chi(k)_{\text{expt}})^2 / \sum \chi(k)_{\text{expt}}^2}$$
 where  $\chi(k)$  are the EXAFS oscillations and  $k$

is the photo-electron wave number given by  $k = \sqrt{\frac{2m_e}{\hbar^2}(E - E_0)}$ . Values in parentheses are

the estimated standard deviations obtained from the diagonal elements of the covariance matrix; these are precisions and are distinct from the accuracies which are expected to be larger (ca  $\pm 0.02$  Å for  $R$ , and  $\pm 20\%$  for  $N$  and  $\sigma^2$ ), although relative accuracies (e.g. comparing two different Cu—O/N scattering interactions) will be more similar to the precisions. Parameters without standard deviation values specified in parentheses are linked as variables to a preceding value in the fit, which will have a value defined if it was permitted to vary during the curve fitting procedure. The  $k$ -range of the data fitted was from 1.0 to 15.75 Å<sup>-1</sup>.

- b. All paths terminate with the originating Cu atom (not indicated).

**Table S3.** Spin Hamiltonian  $g$  and  ${}^{\text{Cu}}\text{A}$  parameters for  $\text{Cu}^{\text{II}}$  EPR, used to fit  $\text{Cu}^{\text{II}}$  in the presence of a 20-fold excess of CPZ (spectra are shown in Figure S4). Fitting was performed using `qpowg`, based on a  $\text{Cu}^{\text{II}}\text{N}_4$  model, and rendered using `gplotn`.<sup>i</sup>

|                                          | $g_1$ | $g_2$ | $g_3$ | ${}^{\text{Cu}}\text{A}_1$ | ${}^{\text{Cu}}\text{A}_2$ | ${}^{\text{Cu}}\text{A}_3$ |
|------------------------------------------|-------|-------|-------|----------------------------|----------------------------|----------------------------|
| $\text{Cu}^{\text{II}}(\text{CPZ})_{xs}$ | 2.049 | 2.049 | 2.185 | -60                        | -60                        | 630                        |

Figure S1

501  $m/z$ ,  $^{63}\text{Cu}^{\text{III}}\text{C}_{16}\text{H}_{24}\text{N}_8\text{O}_4\text{Na}_2$

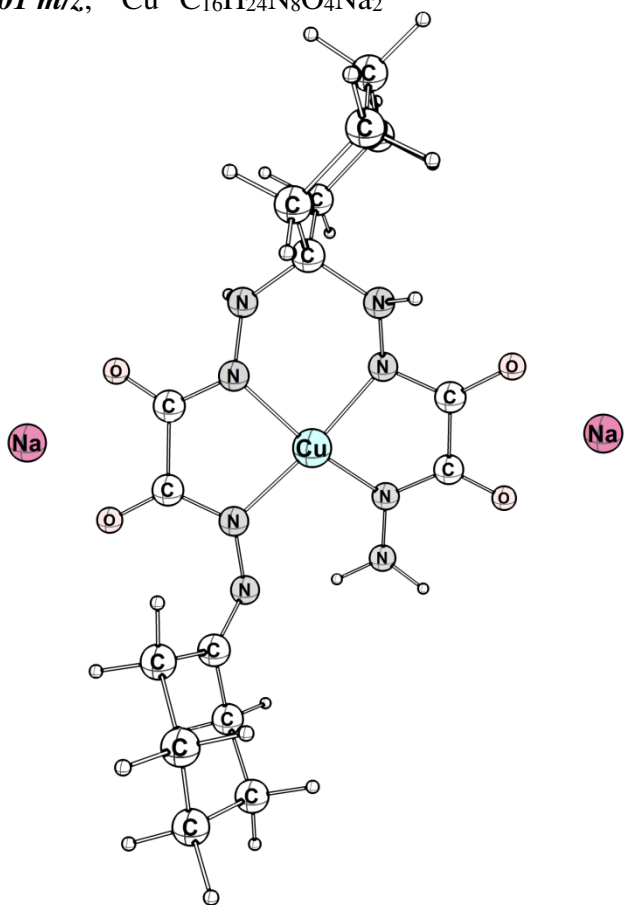

428 m/z,  $^{63}\text{Cu}^{\text{III}}\text{C}_{12}\text{H}_{13}\text{N}_7\text{O}_4\text{Na}_2$  ( $\Delta E$  is relative to 428\_G1)

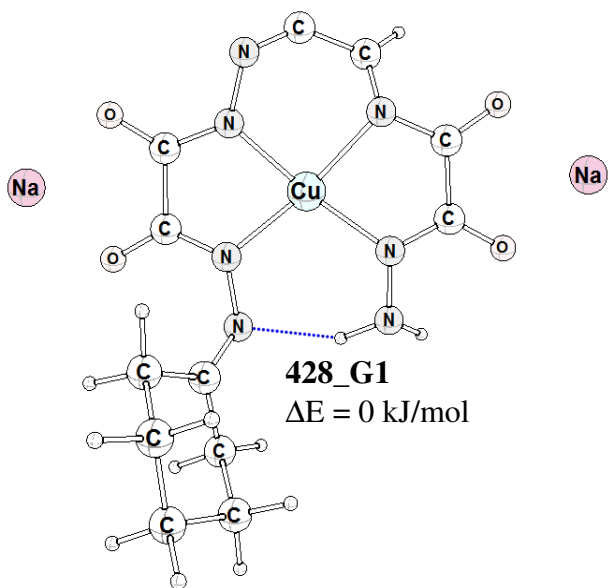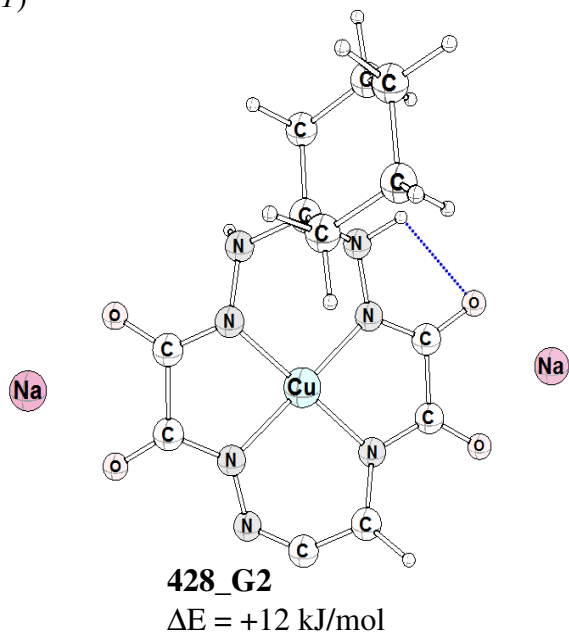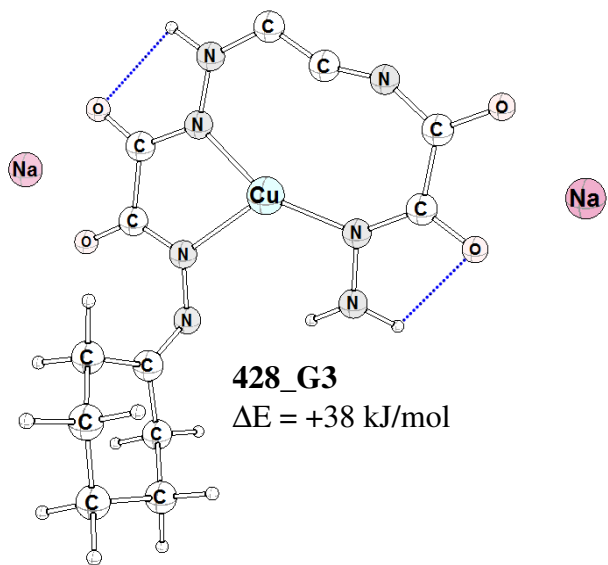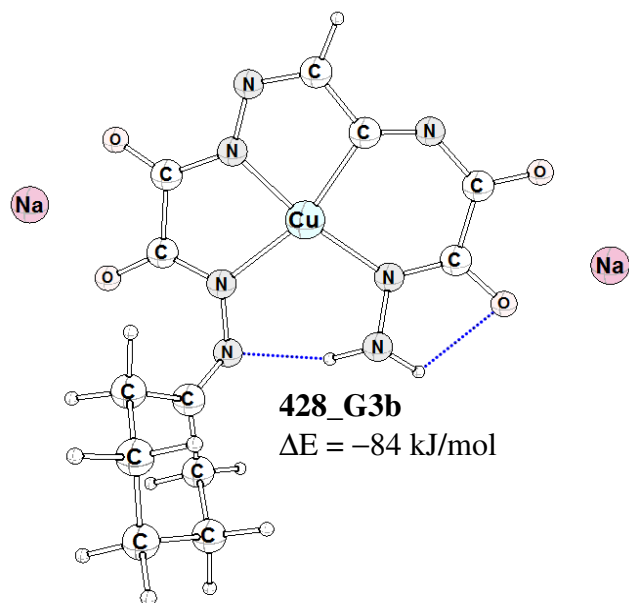



**Figure S1** (*continued*)

428 m/z,  $^{63}\text{Cu}^{\text{III}}\text{C}_{12}\text{H}_{13}\text{N}_7\text{O}_4\text{Na}_2$  (*continued*)

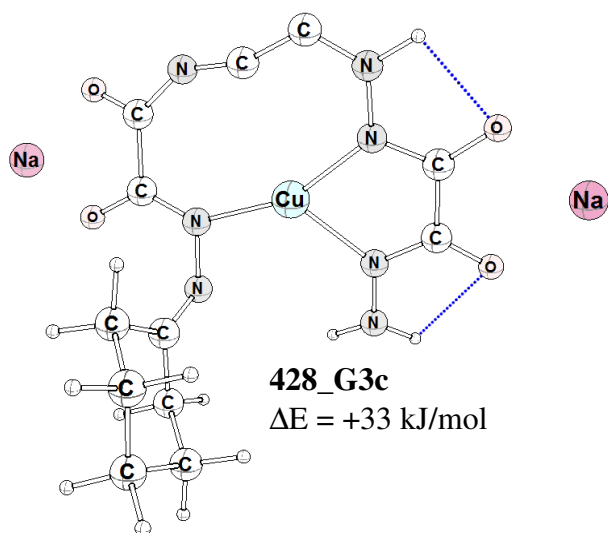

Stabilizing rearrangement of 428\_G3 to 428\_G3b ( $\Delta E = E_{(428\_G3b)} - E_{(428\_G3)}$ ):

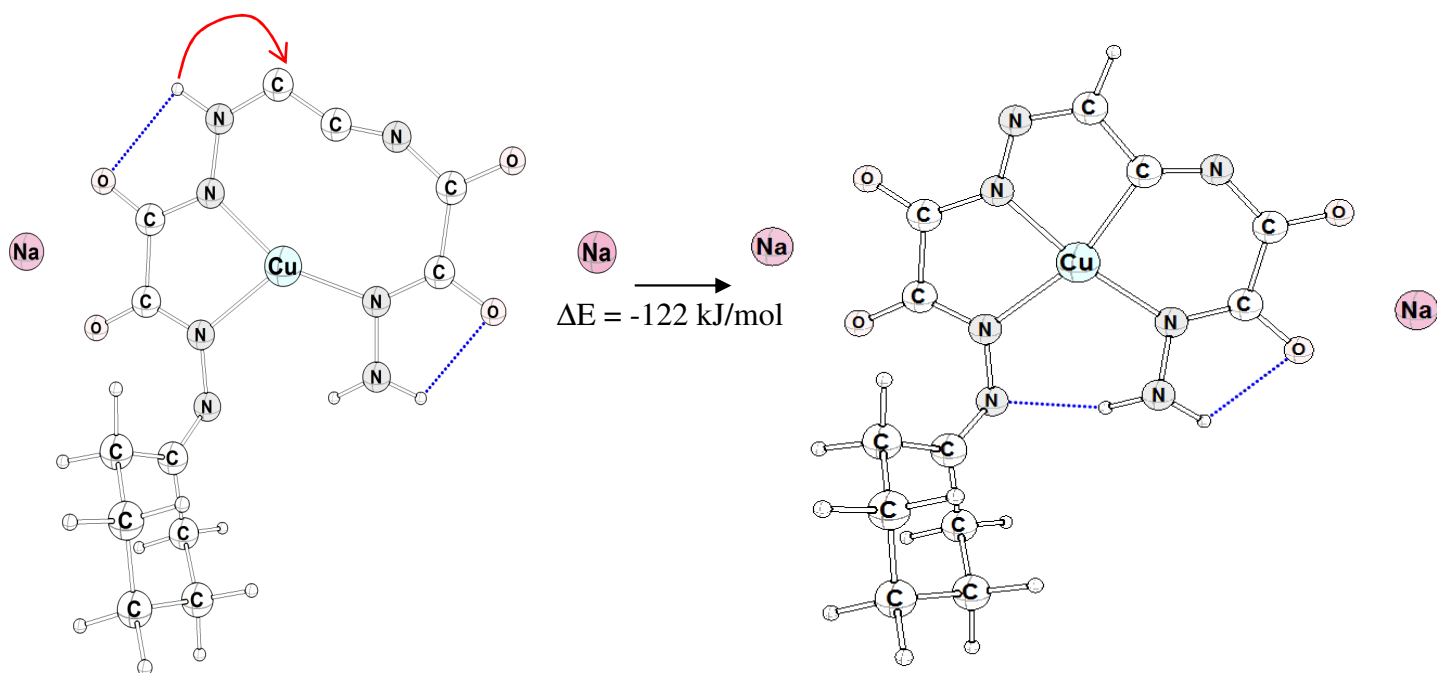

**Figure S1** (*continued*)

417 m/z,  $^{63}\text{Cu}^{\text{III}}\text{C}_{10}\text{H}_{12}\text{N}_8\text{O}_4\text{Na}_2$

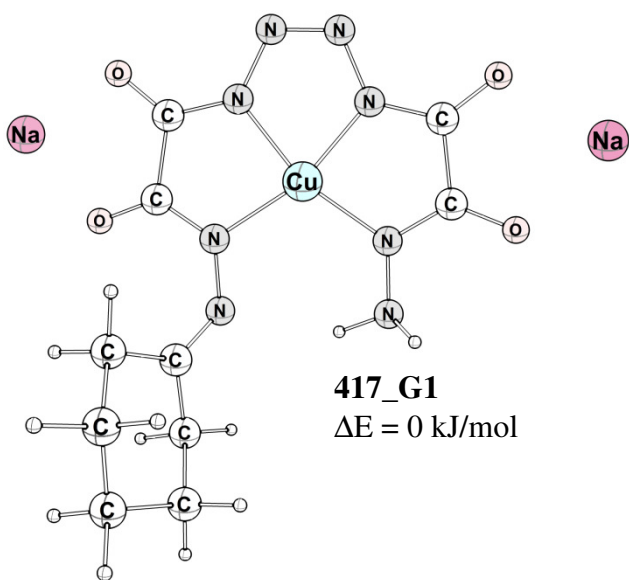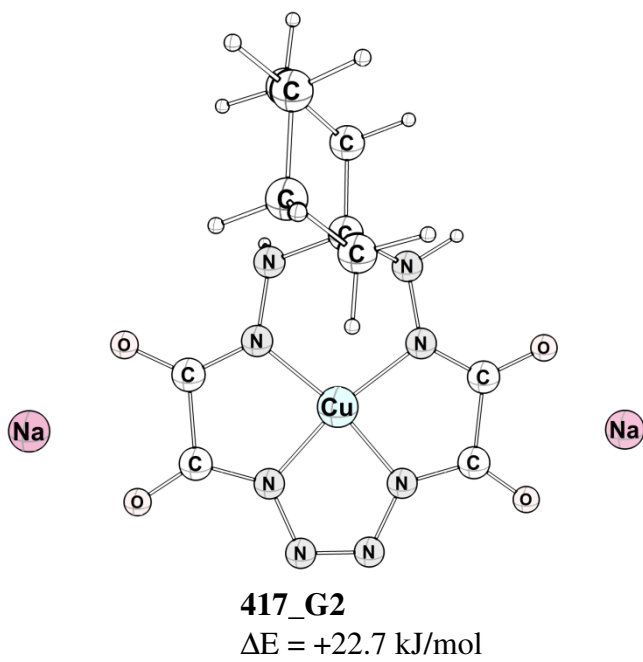

385 *m/z*,  $^{63}\text{Cu}^{\text{III}}\text{C}_9\text{H}_6\text{N}_7\text{O}_4\text{Na}_2$

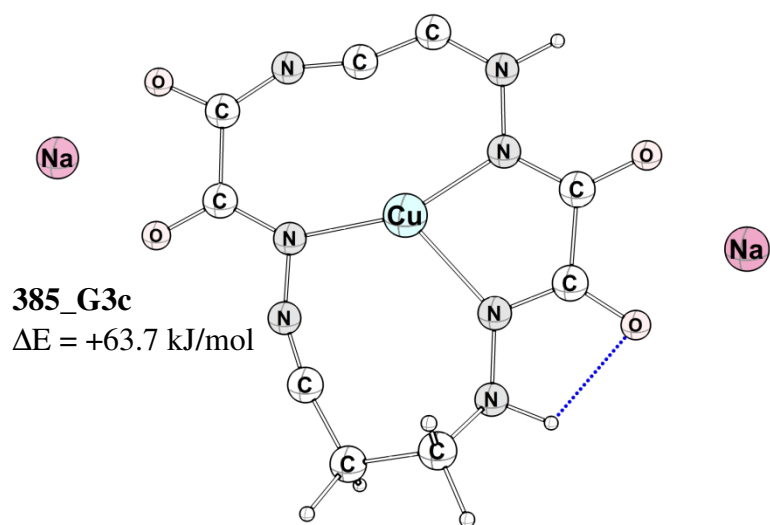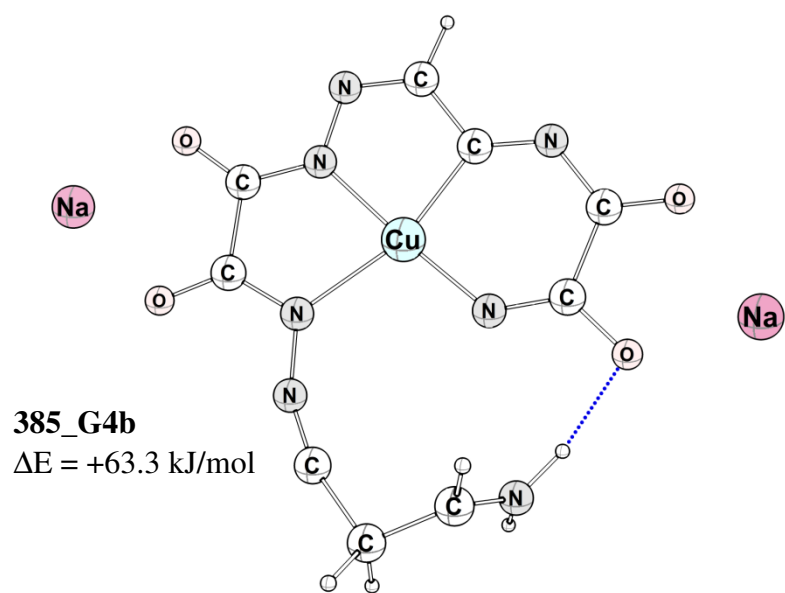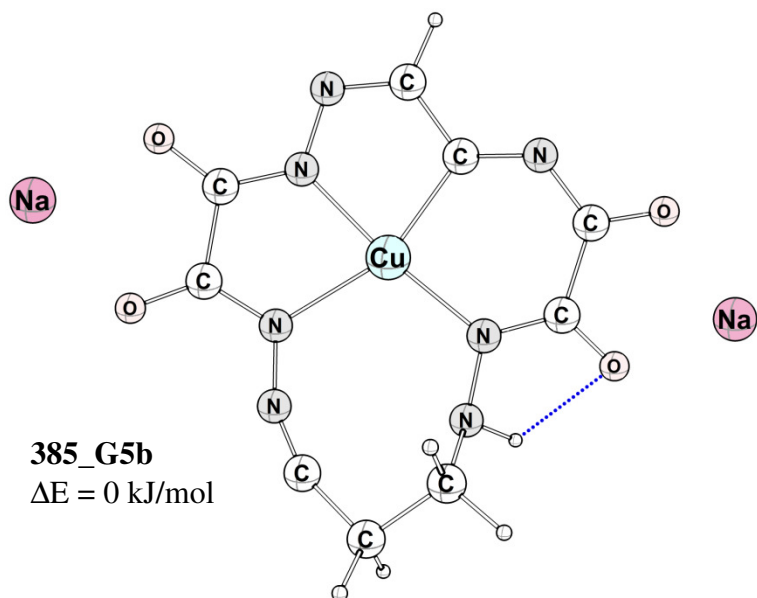

Figure S1 (continued)

348  $m/z$ ,  $^{63}\text{Cu}^{\text{III}}\text{C}_9\text{H}_{13}\text{N}_5\text{O}_3\text{Na}_2$

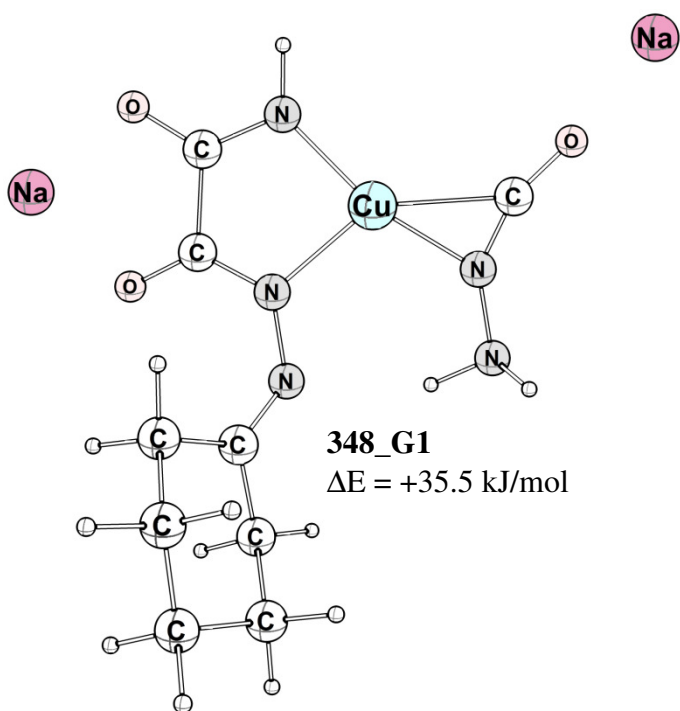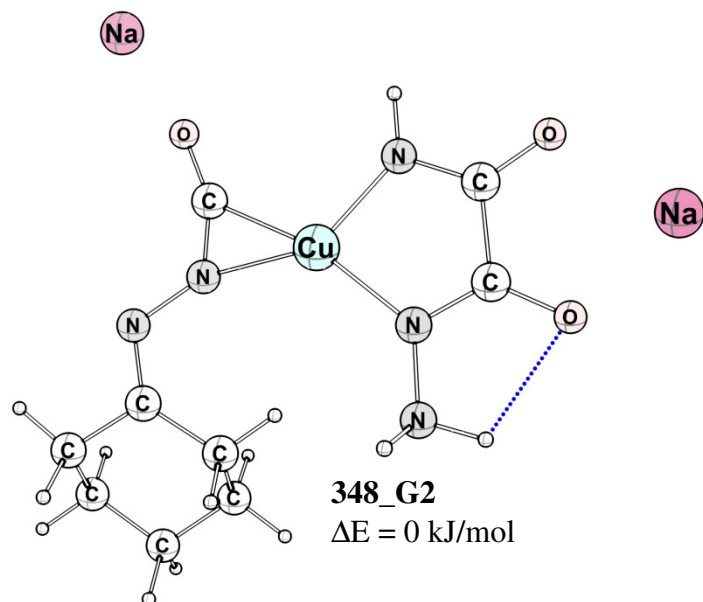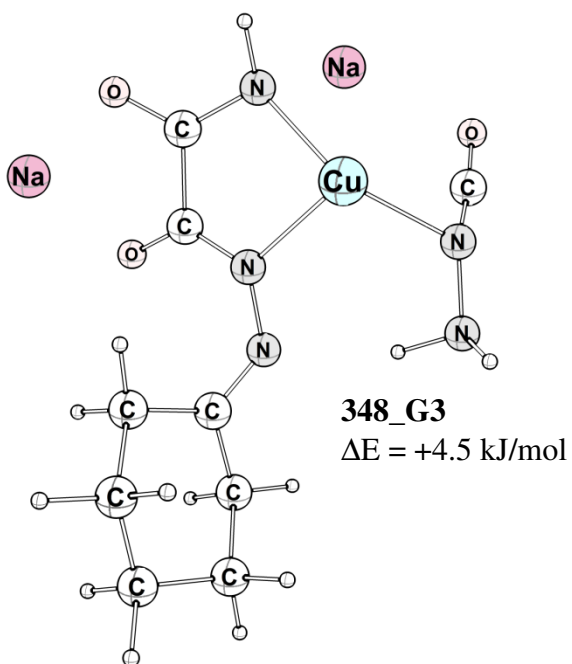

**Figure S1** (*continued*)

**305  $m/z$**  (from 417  $m/z$ ),  $^{63}\text{Cu}^{\text{III}}\text{C}_4\text{N}_6\text{O}_4\text{Na}_2$

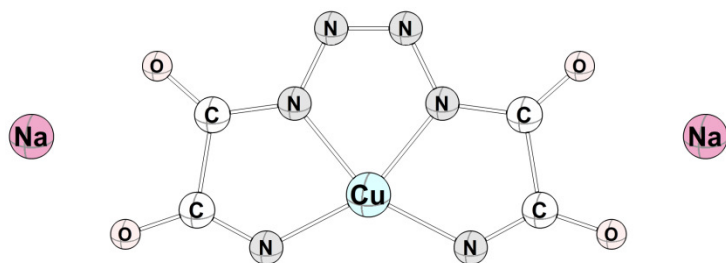

Figure S1 (continued)

305  $m/z$  (from 348  $m/z$  G1),  $^{63}\text{Cu}^{\text{III}}\text{C}_6\text{H}_6\text{N}_5\text{O}_3\text{Na}_2$

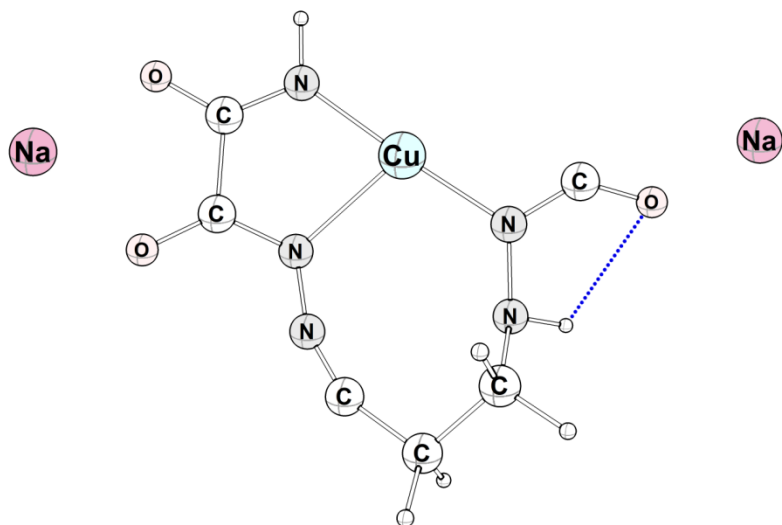

305  $m/z$  (from 348  $m/z$  G2),  $^{63}\text{Cu}^{\text{III}}\text{C}_6\text{H}_6\text{N}_5\text{O}_3\text{Na}_2$

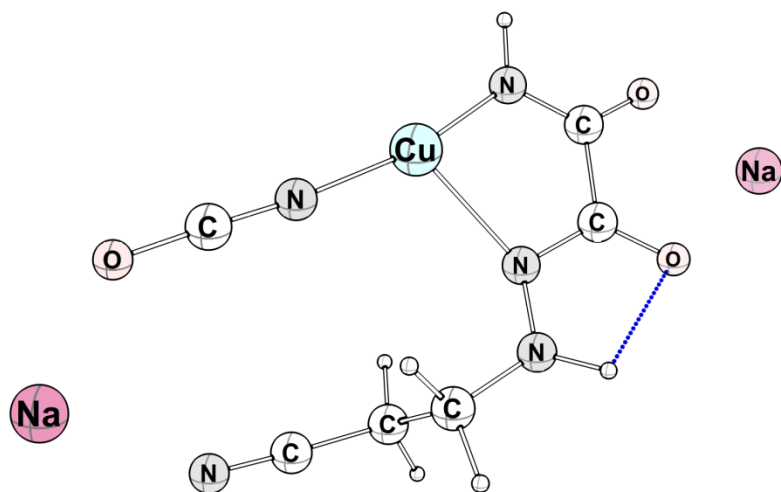

**Figure S1** (*continued*)

**290 m/z**,  $^{63}\text{Cu}^{\text{III}}\text{C}_6\text{H}_5\text{N}_4\text{O}_3\text{Na}_2$

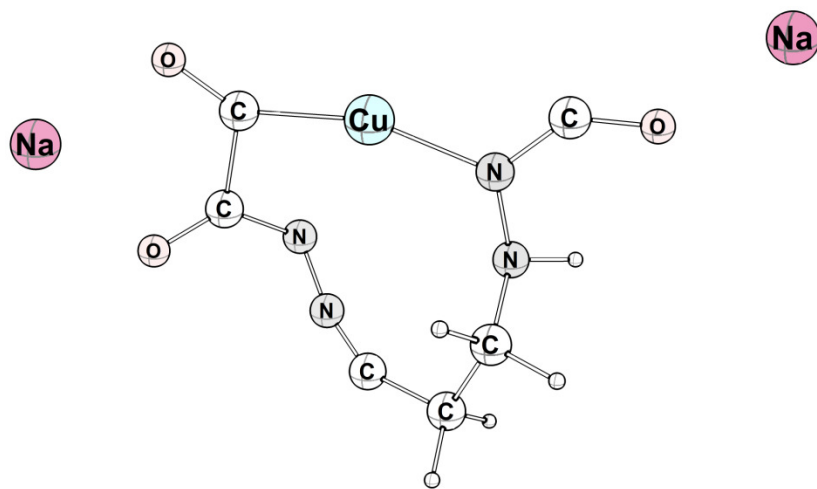

Figure S1 (continued)

247  $m/z$ ,  $^{63}\text{Cu}^{\text{III}}\text{C}_4\text{N}_3\text{O}_3\text{Na}_2$

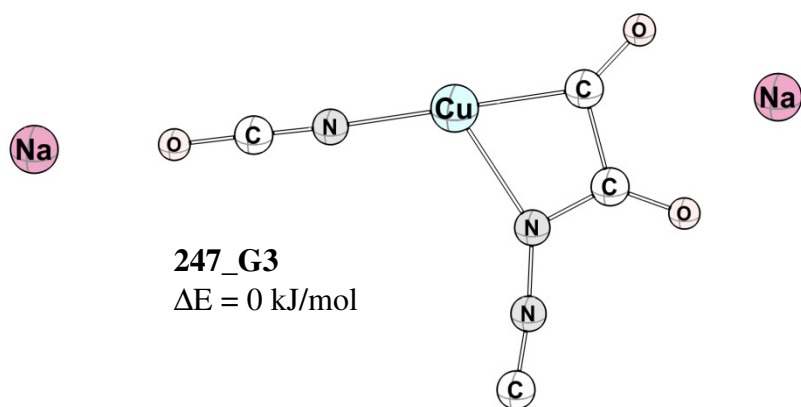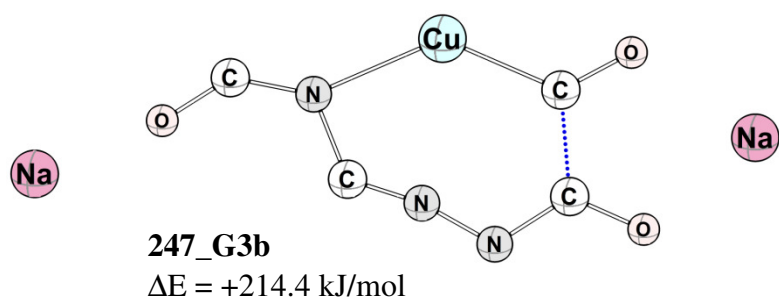



**Figure S1** (*continued*)

**243  $m/z$ ,  $^{63}\text{Cu}^{\text{III}}\text{C}_3\text{H}_3\text{N}_5\text{O}_3\text{Na}$**

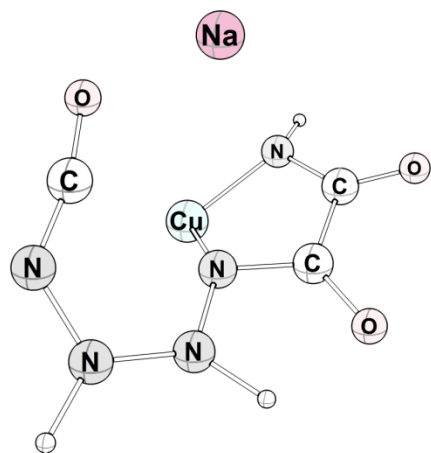

**Figure S1** (*continued*)

**193  $m/z$ ,**  $^{63}\text{Cu}^{\text{III}}\text{C}_2\text{N}_2\text{O}_2\text{Na}_2$

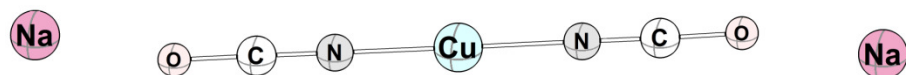

**168  $m/z$ ,**  $^{63}\text{Cu}^{\text{III}}\text{C}_2\text{N}_3\text{ONa}$

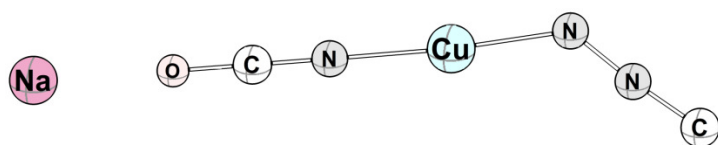

**Figure S2.** Summary of Positive ion mode fragmentation pattern for  $[\text{Cu}^{\text{III}}(\text{CPZmh}_2)_4\text{H}]$ . Structural models for each of the singly positively charged ions are shown in Figure S1, while masses of the molecular ion fragments and the losses are summarized in Table S1. Each fragmentation pathway is indicated with a specific colour. The asterisk represents an alternate fragmentation pathway via a 305  $m/z$  intermediate.

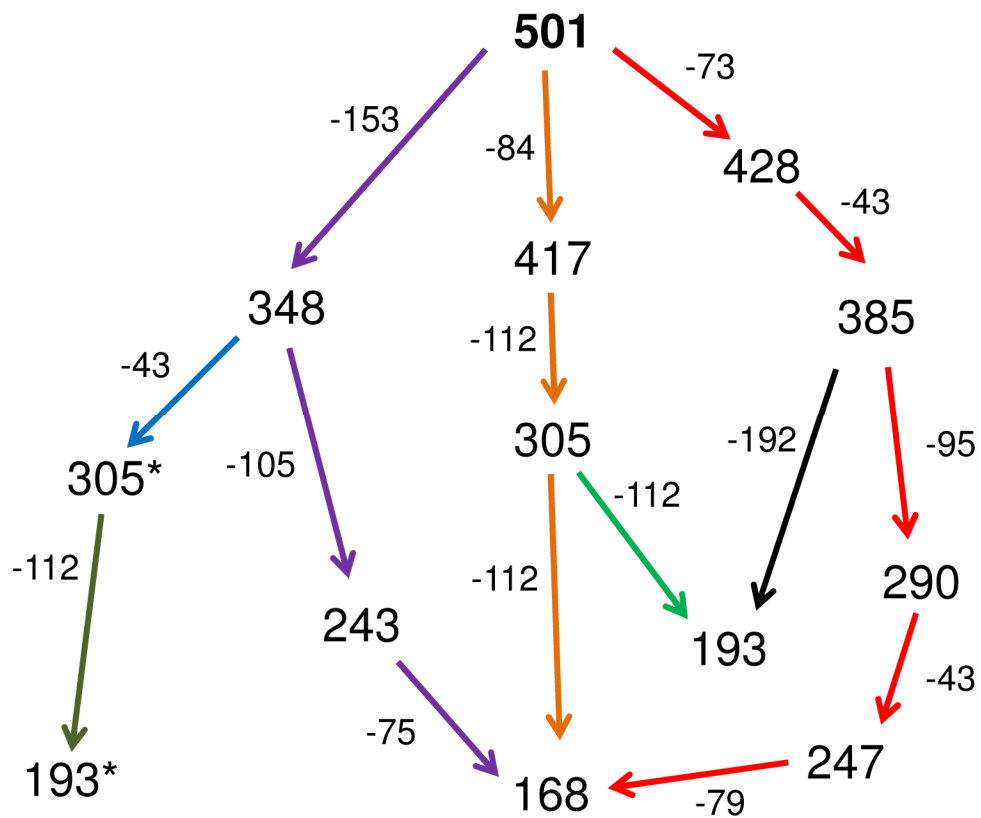

**Figure S3.** Cu K near edge spectrum of the crude reaction mixture, which contains both the blue and green products, demonstrating Cu(II) is present, as evidenced by the weak pre-edge peak, arising from a formally forbidden  $1s \rightarrow 3d$  transition, at  $\sim 8979$  eV. The rising edge obscures this same transition for Cu(III), which has a  $1s \rightarrow 3d$  transition  $\sim 1$  eV higher in energy.

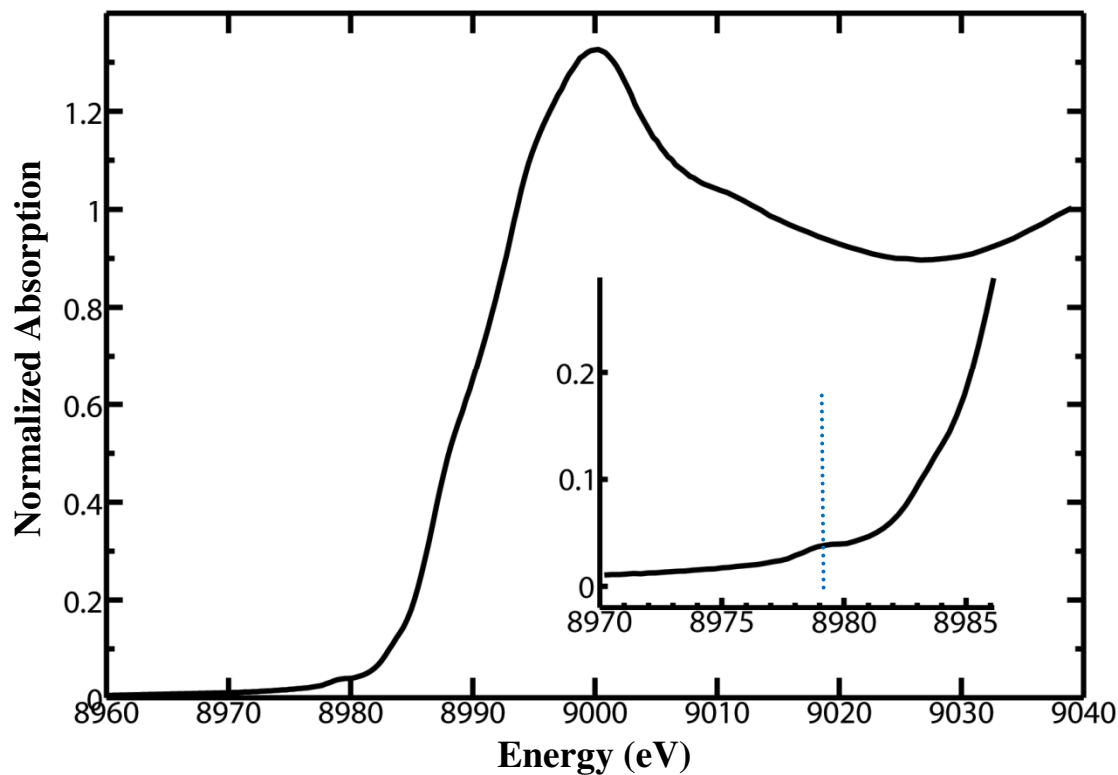

**Figure S4.** EPR data for  $\text{Cu}^{2+}$  in the presence of 2 equivalents of cuprizone, relative to an equivalent concentration of  $\text{Cu}^{\text{II}}\text{EDTA}$  (**A**), and 20 equivalents of cuprizone (**B**) at pH 8.5. X-band EPR spectra were recorded on a JEOL RE1X spectrometer (JEOL USA, Inc. Peabody, MA, USA) at the Stanford Synchrotron Radiation Lightsource, located near to the beamline used for all X-ray absorption spectroscopy measurements. Samples were maintained at 100 K, and data were collected with 0.1 mT modulation amplitude and integrated by reference to a 1 mM aqueous  $\text{Cu}(\text{II})\text{-EDTA}$  standard, with field calibration using a diphenylpicrylhydrazyl standard, as previously described.<sup>ii</sup> Fit parameters for **B** are shown in **Table S3**.

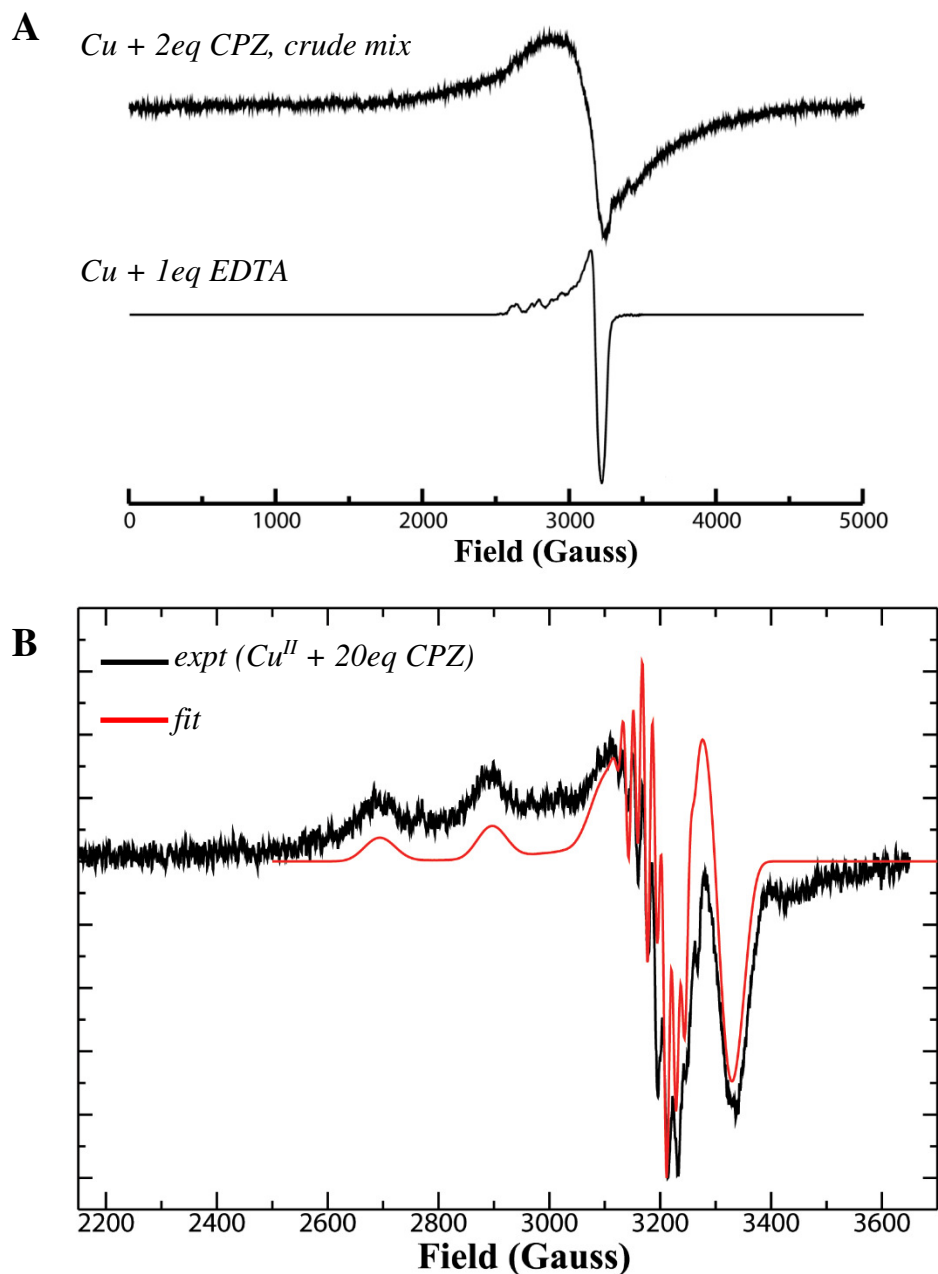

**Figure S5.** Structures from geometry optimizations for the multi-Cu(II) green product. Structures that indicated formation of Cu(I) and Cu(III) during geometry optimizations were omitted from consideration. Interatomic Cu···Cu and Cu–L distances are shown in Ångstroms. Only the model with a Cu···Cu close to that observed in the EXAFS Fourier transform of the green product was employed for EXAFS curve fitting. Charge and spin multiplicity are shown in the top right corner for each structure. All calculations were performed with unrestricted spin. C<sub>6</sub>H<sub>10</sub> moieties were removed for clarity.

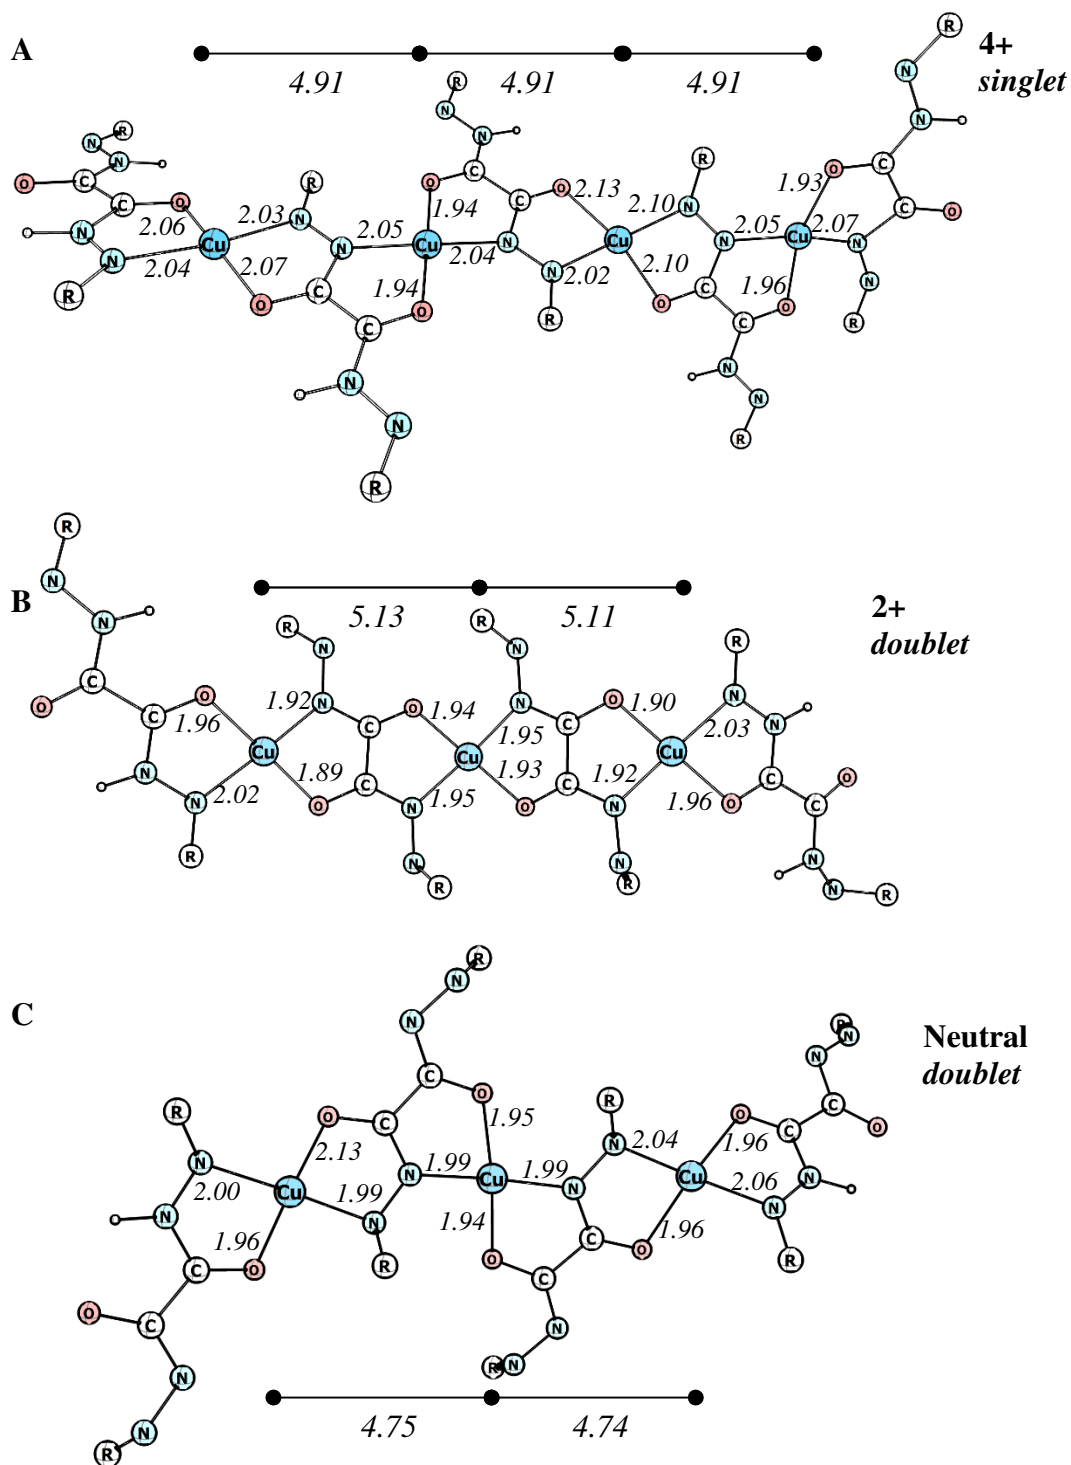

Figure S5. (continued)

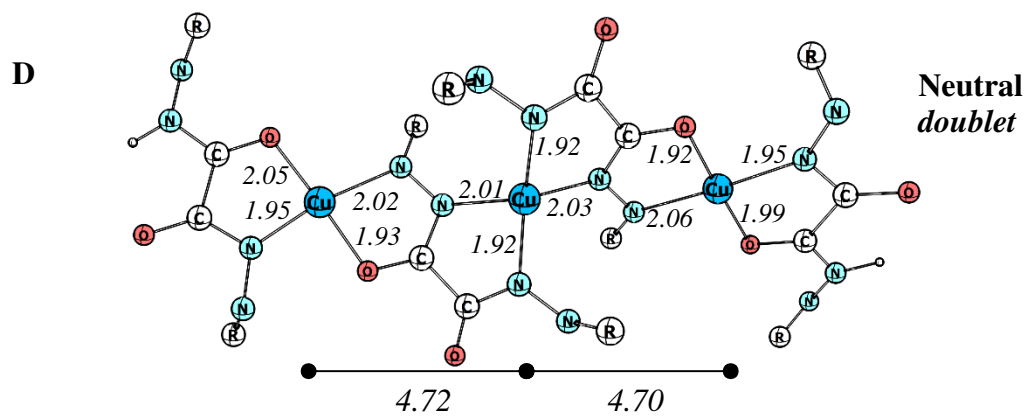

**Figure S5.** Gaussian output from geometry optimizations:

*Tautomeric structures from Figure 5.*

CuII\_CPZmh2\_-4H\_Geom1 (unlinked structure, tautomer 1)

|    |               |               |               |
|----|---------------|---------------|---------------|
| N  | 0.9908906022  | 1.7360187107  | -0.4073767541 |
| C  | 0.4109547522  | 2.8856842571  | -0.0604752503 |
| C  | -1.1261715254 | 2.8437104165  | -0.1871387436 |
| O  | 1.0046580407  | 3.9251692587  | 0.2977451312  |
| O  | -1.8184662305 | 3.8360661429  | 0.0771277459  |
| N  | -1.5806767989 | 1.6382595341  | -0.6264693398 |
| N  | -2.9470875061 | 1.4410942312  | -0.7078645143 |
| C  | -3.6635757829 | 2.1505943217  | -1.4999698026 |
| C  | -3.2098431256 | 3.2129777145  | -2.4740525767 |
| C  | -3.950014989  | 4.5395330503  | -2.2158085492 |
| C  | -5.4746680261 | 4.3426511904  | -2.2076062149 |
| C  | -5.9000188592 | 3.2471765455  | -1.2176958818 |
| C  | -5.1581384068 | 1.9226731606  | -1.4923890705 |
| H  | -2.1330469919 | 3.3528405085  | -2.4216781218 |
| H  | -3.4566542491 | 2.857058789   | -3.4883803143 |
| H  | -3.670879373  | 5.279575045   | -2.9764401379 |
| H  | -3.6078652295 | 4.9185214294  | -1.2486182136 |
| H  | -5.8135056432 | 4.0625107171  | -3.2167530646 |
| H  | -5.9768340572 | 5.287355432   | -1.9617885085 |
| H  | -6.9857267463 | 3.0898853299  | -1.2657107502 |
| H  | -5.6647310183 | 3.5728988086  | -0.1977325433 |
| H  | -5.4794171908 | 1.5387378785  | -2.474438085  |
| H  | -5.4023376353 | 1.1684921498  | -0.7411819617 |
| Cu | -0.2042304044 | 0.1209192844  | -0.388342598  |
| C  | 5.1245361958  | -2.9612601904 | 2.6301251604  |
| C  | 3.6038342719  | -3.0697456486 | 2.7994221661  |
| C  | 2.8537550276  | -3.0936302338 | 1.4517754529  |
| C  | 3.2957892903  | -1.9808283622 | 0.5332652141  |
| C  | 4.7873562742  | -1.7407188807 | 0.434974427   |
| C  | 5.4903975311  | -1.7213656831 | 1.8036666137  |
| N  | 2.5382076146  | -1.2078516648 | -0.1612814286 |
| N  | 1.1756448801  | -1.4030895331 | -0.2001115366 |
| C  | 0.6971553851  | -2.6037656114 | -0.6409917193 |
| C  | -0.8439154621 | -2.6434740827 | -0.6868284213 |
| O  | 1.3755880265  | -3.5837484929 | -0.9700929327 |
| O  | -1.4574439143 | -3.6869299193 | -0.999394158  |
| N  | -1.4039742946 | -1.4878267427 | -0.3292674871 |
| H  | 5.4992436813  | -3.8600045019 | 2.1194840764  |
| H  | 5.6175685234  | -2.9277185093 | 3.6105390834  |
| H  | 3.3477010649  | -3.9675608155 | 3.3750006896  |
| H  | 3.2536335264  | -2.212201583  | 3.3885735887  |
| H  | 1.7785623618  | -3.012260782  | 1.617555742   |



|   |               |               |               |
|---|---------------|---------------|---------------|
| H | 3.0037295242  | -4.0525951124 | 0.9398765015  |
| H | 4.9539539951  | -0.8113474557 | -0.1150948834 |
| H | 5.2264267359  | -2.5517365529 | -0.167352813  |
| H | 5.185180374   | -0.8214462877 | 2.3529555334  |
| H | 6.5778711782  | -1.6555640754 | 1.6684919032  |
| N | -2.8160443196 | -1.517168234  | -0.2373303129 |
| H | -3.1442798542 | -0.5654099614 | -0.3998191765 |
| H | -3.1674689689 | -2.1594419891 | -0.9497954797 |
| N | 2.4052721526  | 1.7707278889  | -0.4325087655 |
| H | 2.7266901474  | 0.810183952   | -0.3143323668 |
| H | 2.7263632164  | 2.3707635888  | 0.3292045129  |

CuII\_CPZmh2\_-4H\_GeomX1 (pseudo-macrocyclic structure, tautomer 2)

|    |               |               |               |
|----|---------------|---------------|---------------|
| N  | -2.0779561307 | -2.8852752806 | -0.3011394593 |
| C  | -3.3130673786 | -2.6562132447 | -0.7577882838 |
| C  | -3.7431572111 | -1.1760511002 | -0.5812727069 |
| O  | -4.065569496  | -3.5045165422 | -1.2838827783 |
| O  | -4.9119713553 | -0.7773424747 | -0.781949479  |
| N  | -2.7260458598 | -0.4060440145 | -0.1911788639 |
| N  | -3.0156165915 | 0.9452444543  | 0.1130686084  |
| C  | -2.0103481287 | 1.8883220248  | -0.4383167525 |
| C  | -2.5491590849 | 3.3127552288  | -0.1760159466 |
| C  | -3.7700967299 | 3.681685556   | -1.032038519  |
| C  | -3.4969638572 | 3.4685844249  | -2.5282185676 |
| C  | -2.9921069267 | 2.0440383252  | -2.80027577   |
| C  | -1.7549906915 | 1.712112898   | -1.955750925  |
| H  | -2.7929663633 | 3.3990686749  | 0.8887614431  |
| H  | -1.7293803787 | 4.0088897558  | -0.3831250301 |
| H  | -4.0463216892 | 4.7273754645  | -0.841548655  |
| H  | -4.6360272213 | 3.0789009287  | -0.7339355358 |
| H  | -2.7363151009 | 4.1909974095  | -2.8594997795 |
| H  | -4.4038791318 | 3.6748339885  | -3.1113846385 |
| H  | -2.751394718  | 1.9289243368  | -3.8643456807 |
| H  | -3.788267791  | 1.3230000768  | -2.5824640396 |
| H  | -0.920070037  | 2.3680651156  | -2.2297781238 |
| H  | -1.432999218  | 0.6876652216  | -2.1421000864 |
| Cu | -0.9571836178 | -1.2353128624 | -0.0234637818 |
| C  | 4.217077926   | -4.2930144035 | -2.9746943452 |
| C  | 3.6257268664  | -2.8781072765 | -2.9936635574 |
| C  | 3.2641393111  | -2.3652832976 | -1.5850455075 |
| C  | 2.4454144758  | -3.3657861878 | -0.8051365146 |
| C  | 2.904508101   | -4.8077740387 | -0.8685862647 |
| C  | 3.2515357269  | -5.2719043763 | -2.2943285117 |
| N  | 1.3922641071  | -3.1230787577 | -0.1096450034 |
| N  | 0.9588943419  | -1.8226271688 | 0.0658667775  |

|   |               |               |               |
|---|---------------|---------------|---------------|
| C | 1.7840556841  | -0.904130373  | 0.6375044341  |
| C | 1.0909464424  | 0.4770665842  | 0.8367993812  |
| O | 2.9532695393  | -1.084872045  | 0.9977161305  |
| O | 1.6005051396  | 1.347697574   | 1.5594244882  |
| N | -0.0566238053 | 0.5681494753  | 0.1431714338  |
| H | 5.1700585597  | -4.2832238035 | -2.4262968394 |
| H | 4.4447140355  | -4.6268660769 | -3.9954840636 |
| H | 4.3246947358  | -2.1787454219 | -3.4682222143 |
| H | 2.7211670001  | -2.8840072473 | -3.6156120603 |
| H | 2.7078137019  | -1.4297907549 | -1.6571822851 |
| H | 4.1702283407  | -2.130200173  | -1.0125682995 |
| H | 2.1322192149  | -5.4352894319 | -0.4171876798 |
| H | 3.8056857648  | -4.9079052375 | -0.2432765761 |
| H | 2.3298820812  | -5.3354332564 | -2.8867631157 |
| H | 3.6807179469  | -6.2819197498 | -2.2679270976 |
| N | -0.7321611262 | 1.8051570405  | 0.2725688412  |
| H | -0.8711266494 | 2.0128235998  | 1.2623540238  |
| H | -3.9466981361 | 1.1166884398  | -0.271620725  |
| N | -1.6369862521 | -4.2362143581 | -0.3862203502 |
| H | -0.6206650056 | -4.2025833067 | -0.4299626167 |
| H | -2.0218796145 | -4.6432418875 | -1.2411843058 |

CuII\_CPZmh2\_-4H\_cyc (cyclic structure, tautomer 3)

|   |                 |                 |                 |
|---|-----------------|-----------------|-----------------|
| N | -0.997001045302 | -1.784148120134 | 0.098030372816  |
| C | -0.202283734334 | -2.870672282135 | 0.038986051232  |
| C | 1.222579924535  | -2.554479361611 | 0.644434780376  |
| O | -0.471211577958 | -3.988877800365 | -0.422918844085 |
| O | 1.862287234676  | -3.412017632281 | 1.269036412757  |
| N | 1.574060194693  | -1.277123062470 | 0.392784135561  |
| N | 2.784578188658  | -0.778049735165 | 0.954389188254  |
| C | 3.143288271205  | 0.577072813749  | 0.503343417678  |
| C | 3.273786348234  | 0.591888468518  | -1.038525565591 |
| C | 4.379115157637  | -0.339180457751 | -1.552180046061 |
| C | 5.734999048599  | -0.007171601784 | -0.912459207113 |
| C | 5.640397456156  | -0.028007966853 | 0.619871550996  |
| C | 4.520678492423  | 0.888011150214  | 1.132828686526  |
| H | 2.313149360461  | 0.325075515736  | -1.477916881250 |
| H | 3.486896764260  | 1.626203872752  | -1.338739287716 |
| H | 4.450557967660  | -0.262111139935 | -2.645189777250 |
| H | 4.107180185437  | -1.372317609311 | -1.316666775803 |
| H | 6.057387692905  | 0.991824750721  | -1.243593625737 |
| H | 6.504115729496  | -0.713391711146 | -1.252307666701 |
| H | 6.598451958726  | 0.275092956294  | 1.064365578958  |
| H | 5.433578052511  | -1.050355589948 | 0.949370478626  |
| H | 4.768791908890  | 1.934643234130  | 0.912055162083  |

|    |                 |                 |                 |
|----|-----------------|-----------------|-----------------|
| H  | 4.428979617185  | 0.813605791024  | 2.222135623865  |
| Cu | 0.029455024349  | -0.127276700468 | 0.122589931542  |
| C  | -5.711654855403 | 0.276058881185  | 0.960011591196  |
| C  | -5.591859970489 | 0.050343763373  | -0.554350241272 |
| C  | -4.500548034305 | -0.979182223397 | -0.885841404611 |
| C  | -3.121009597395 | -0.654848981842 | -0.267850011695 |
| C  | -3.285506786431 | -0.421738493414 | 1.253284745190  |
| C  | -4.350730781716 | 0.634699982486  | 1.574411085906  |
| N  | -2.609491606561 | 0.546725839558  | -1.000772555352 |
| N  | -1.397835480777 | 1.039319188598  | -0.464952743883 |
| C  | -1.186109192649 | 2.353877923347  | -0.386714405920 |
| C  | 0.264811410699  | 2.674508956056  | 0.141029555665  |
| O  | -2.004204210466 | 3.247407846609  | -0.693318048637 |
| O  | 0.700212310108  | 3.841433793902  | 0.236100066489  |
| N  | 0.926033158425  | 1.560565899431  | 0.460024307857  |
| H  | -6.087454610654 | -0.644536223022 | 1.430054135409  |
| H  | -6.449603029073 | 1.061527157441  | 1.169194064384  |
| H  | -6.551674855330 | -0.291190809937 | -0.964437111328 |
| H  | -5.374096851271 | 1.005779624296  | -1.046651819885 |
| H  | -4.381122812490 | -1.068889405346 | -1.971336131985 |
| H  | -4.795481803272 | -1.962504185801 | -0.505432367185 |
| H  | -2.323048490903 | -0.127109707945 | 1.670946544892  |
| H  | -3.553172717743 | -1.382152408250 | 1.709183128527  |
| H  | -4.023478240306 | 1.611383718144  | 1.199513079037  |
| H  | -4.446583059187 | 0.738044853181  | 2.662192469202  |
| N  | 2.227056511267  | 1.644825673507  | 1.011954015047  |
| H  | 2.593381003907  | 2.568558488019  | 0.767947530901  |
| H  | 2.702786664082  | -0.770465982435 | 1.971478888509  |
| N  | -2.299824833905 | -1.861357002511 | -0.476300303604 |
| H  | -2.209684584382 | -2.024549132618 | -1.480058450968 |
| H  | -3.278783399645 | 1.317319590325  | -0.968979407406 |

sCuIII\_CPZmh2\_-4H\_Geom1 (unlinked structure, tautomer 1)

|   |               |               |               |
|---|---------------|---------------|---------------|
| N | 0.2769411212  | -1.6002755011 | 1.0172065588  |
| C | -0.4133340429 | -2.3429862005 | 0.0883991682  |
| C | -1.6539502909 | -1.6355134857 | -0.4344426374 |
| O | -0.0884310618 | -3.4728598078 | -0.2720110313 |
| O | -2.4238990754 | -2.1755209703 | -1.2209536424 |
| N | -1.7813274622 | -0.3746936287 | 0.0999652808  |
| N | -2.7548859515 | 0.432824319   | -0.4127233153 |
| C | -4.0029788856 | 0.1545820039  | -0.3119486902 |
| C | -4.6327991637 | -1.0208440219 | 0.3949385574  |
| C | -5.5782112458 | -1.7849172519 | -0.5538531413 |
| C | -6.6062965317 | -0.8466488472 | -1.2027218926 |
| C | -5.9259864505 | 0.3350659068  | -1.909154931  |

|    |               |               |               |
|----|---------------|---------------|---------------|
| C  | -4.9911764194 | 1.1006305493  | -0.9499353265 |
| H  | -3.8796039291 | -1.6840138727 | 0.812691407   |
| H  | -5.2209875849 | -0.6129933509 | 1.2314289539  |
| H  | -6.088296607  | -2.5804628202 | 0.00000756    |
| H  | -4.9650984393 | -2.265054745  | -1.3211874918 |
| H  | -7.2886083008 | -0.4604050866 | -0.4321998538 |
| H  | -7.2246665102 | -1.4036679013 | -1.9155737064 |
| H  | -6.6758643578 | 1.0202891523  | -2.3198628885 |
| H  | -5.3352446287 | -0.0381339547 | -2.7536225974 |
| H  | -5.6000475345 | 1.5678275025  | -0.1622213795 |
| H  | -4.4554542909 | 1.8951325328  | -1.4730367865 |
| Cu | 0.0236625764  | 0.3636587965  | 0.6213739134  |
| C  | 6.7123590619  | -0.0784028269 | -0.3825716543 |
| C  | 5.5901221637  | 0.6807588576  | -1.0990479335 |
| C  | 4.590715808   | 1.3263772658  | -0.1176329827 |
| C  | 4.1072417232  | 0.350842079   | 0.9240553626  |
| C  | 5.1580910453  | -0.5249122492 | 1.568787055   |
| C  | 6.1312985537  | -1.1465702965 | 0.551438293   |
| N  | 2.8944509917  | 0.1896222099  | 1.318138793   |
| N  | 1.8929474883  | 1.0200002335  | 0.8466176829  |
| C  | 1.9790301009  | 2.352048757   | 1.1178985534  |
| C  | 0.7154525004  | 3.0892062761  | 0.6608594829  |
| O  | 2.9282389039  | 2.9454233539  | 1.6208567627  |
| O  | 0.7536685463  | 4.2530072085  | 0.2612933872  |
| N  | -0.4099201796 | 2.3238818521  | 0.7293971708  |
| H  | 7.3163171562  | 0.6275071626  | 0.2032731081  |
| H  | 7.3869017034  | -0.5386282261 | -1.1133868743 |
| H  | 6.0056772282  | 1.4577566578  | -1.7490904305 |
| H  | 5.0512663074  | -0.0164958417 | -1.7529149684 |
| H  | 3.7374052265  | 1.7351164553  | -0.6595345845 |
| H  | 5.0525413758  | 2.1747699299  | 0.4012497354  |
| H  | 4.6654386736  | -1.2887671704 | 2.1749464695  |
| H  | 5.7320129621  | 0.1069188086  | 2.2616651152  |
| H  | 5.6005909861  | -1.8981614746 | -0.0460969782 |
| H  | 6.931619587   | -1.6743857415 | 1.0816657484  |
| N  | -1.5127954935 | 2.9181573239  | 0.1498274346  |
| H  | -1.2362364844 | 3.5203115077  | -0.6276135631 |
| H  | -2.1816305033 | 2.192755      | -0.1305767073 |
| N  | 1.4333496171  | -2.1883873483 | 1.4180558748  |
| H  | 2.098734777   | -1.4813724719 | 1.7485843217  |
| H  | 1.8032201393  | -2.8358447439 | 0.7194638487  |

sCuIII\_CPZmh2\_-4H\_GeomX1 (pseudo-macrocyclic structure, tautomer 2)

|   |               |               |               |
|---|---------------|---------------|---------------|
| N | -1.8046566067 | -2.732891499  | 0.028198347   |
| C | -2.9695838595 | -2.7787226763 | -0.6666066041 |

|    |               |               |               |
|----|---------------|---------------|---------------|
| C  | -3.3428561804 | -1.410096134  | -1.2183716427 |
| O  | -3.617206507  | -3.8001292729 | -0.9111885313 |
| O  | -4.16875667   | -1.2575627263 | -2.109994072  |
| N  | -2.5952486238 | -0.370934801  | -0.6640852657 |
| N  | -2.7068647384 | 0.7768380399  | -1.3797279988 |
| C  | -2.0713553801 | 1.9959942176  | -0.9047785561 |
| C  | -2.9779018991 | 2.666888778   | 0.1548672388  |
| C  | -4.3142457821 | 3.1407261643  | -0.4279058341 |
| C  | -4.118320155  | 4.0673530544  | -1.6364073825 |
| C  | -3.2509277121 | 3.4006083781  | -2.71286328   |
| C  | -1.9102399351 | 2.9323341934  | -2.126459842  |
| H  | -3.1487205269 | 1.9468610369  | 0.9606075306  |
| H  | -2.4311452238 | 3.5185558352  | 0.5793171005  |
| H  | -4.8892742427 | 3.6516613285  | 0.3520179501  |
| H  | -4.8955105618 | 2.2646627483  | -0.7317391663 |
| H  | -3.6330440483 | 4.9970215212  | -1.3084899485 |
| H  | -5.0901095595 | 4.351100378   | -2.0550227985 |
| H  | -3.0594845372 | 4.1000676959  | -3.5342292347 |
| H  | -3.7982301758 | 2.5564857149  | -3.1470562958 |
| H  | -1.3379268877 | 3.7979678442  | -1.7822398641 |
| H  | -1.29387487   | 2.4283827464  | -2.8779153489 |
| Cu | -0.7785941205 | -1.118485798  | -0.3854441203 |
| C  | 4.1873362206  | -4.9775644378 | -2.6964098281 |
| C  | 3.6539059191  | -3.5914982889 | -3.0771441381 |
| C  | 3.3627901904  | -2.7101299807 | -1.8449252302 |
| C  | 2.5244433563  | -3.4339508105 | -0.8205860055 |
| C  | 2.9327824194  | -4.8530015558 | -0.4974154263 |
| C  | 3.2122881885  | -5.6948843275 | -1.7546705946 |
| N  | 1.4918510431  | -2.9716510877 | -0.2140496567 |
| N  | 1.1044459186  | -1.6601245756 | -0.3875700431 |
| C  | 1.9403027691  | -0.6599209355 | 0.0143430318  |
| C  | 1.1982409085  | 0.6876113463  | 0.1004443413  |
| O  | 3.1174383538  | -0.7654976081 | 0.3437342969  |
| O  | 1.6402554332  | 1.6216616954  | 0.7587022771  |
| N  | -0.0025390259 | 0.7020151454  | -0.5820856482 |
| H  | 5.1615316635  | -4.8715926672 | -2.1999988442 |
| H  | 4.3577660941  | -5.5787079349 | -3.5968111569 |
| H  | 4.3644695509  | -3.0733132594 | -3.7299026739 |
| H  | 2.7303110562  | -3.7138186535 | -3.6568507002 |
| H  | 2.8599720141  | -1.7901605848 | -2.1441283033 |
| H  | 4.2989560773  | -2.4024953714 | -1.3644637495 |
| H  | 2.1649131195  | -5.3098016234 | 0.1308472055  |
| H  | 3.8517417622  | -4.8056785728 | 0.1045137588  |
| H  | 2.2688675365  | -5.8781892565 | -2.2838528851 |
| H  | 3.6060491857  | -6.6752633782 | -1.4643571977 |
| N  | -0.7616939628 | 1.7993898724  | -0.2684924567 |

|   |               |               |               |
|---|---------------|---------------|---------------|
| H | -0.744693207  | 2.0084493454  | 0.7283343339  |
| H | -2.7240119956 | 0.6354487491  | -2.3878832018 |
| N | -1.2810192157 | -3.9627598323 | 0.3739708012  |
| H | -0.2634714304 | -3.8854964213 | 0.4397412732  |
| H | -1.5816273949 | -4.6784693089 | -0.2903617355 |

sCuIII\_CPZmh2\_-4H\_cycGeom3 (cyclic structure, tautomer 3)

|    |               |               |               |
|----|---------------|---------------|---------------|
| N  | -0.9312151525 | 1.5611376731  | 0.5017617245  |
| C  | -0.3665345395 | 2.6996279645  | 0.0557331318  |
| C  | 1.0588767353  | 2.4413614687  | -0.4808312116 |
| O  | -0.8987149066 | 3.8131644205  | 0.0494190644  |
| O  | 1.6813071255  | 3.2621169038  | -1.1393846108 |
| N  | 1.5095592829  | 1.1810306184  | -0.1474274546 |
| N  | 2.6635712168  | 0.7573846699  | -0.7618187958 |
| C  | 3.1472392652  | -0.556390489  | -0.3766505602 |
| C  | 3.3188334189  | -0.6341732425 | 1.1575368228  |
| C  | 4.4030168983  | 0.3171196932  | 1.6809653347  |
| C  | 5.7468460671  | 0.0736925567  | 0.9809218883  |
| C  | 5.6016582572  | 0.166586956   | -0.5441684911 |
| C  | 4.5057401817  | -0.7715614707 | -1.0698294716 |
| H  | 2.3645519715  | -0.4288668325 | 1.6437535457  |
| H  | 3.5860796566  | -1.6692699801 | 1.4007404589  |
| H  | 4.5111308648  | 0.1854040255  | 2.7634268349  |
| H  | 4.0842208926  | 1.3508443807  | 1.5153306561  |
| H  | 6.1208180252  | -0.9239613812 | 1.2506137241  |
| H  | 6.494964551   | 0.7935422729  | 1.3314372667  |
| H  | 6.5518061732  | -0.0766527905 | -1.0332376412 |
| H  | 5.3551553932  | 1.1968213659  | -0.8195651685 |
| H  | 4.8020865353  | -1.814954176  | -0.9100896854 |
| H  | 4.3706984642  | -0.6518897587 | -2.1497298561 |
| Cu | -0.005121478  | -0.01347762   | 0.0262003662  |
| C  | -5.7568445019 | -0.0999023247 | -0.929575256  |
| C  | -5.6119981092 | -0.1931355282 | 0.5955324163  |
| C  | -4.5160964559 | 0.7448116391  | 1.1215807792  |
| C  | -3.1574504599 | 0.5296035036  | 0.4287042793  |
| C  | -3.3286714767 | 0.6076537542  | -1.1055376499 |
| C  | -4.4129044653 | -0.3433571786 | -1.6293973903 |
| N  | -2.6741470473 | -0.7844433463 | 0.8136773095  |
| N  | -1.5198153469 | -1.2079278844 | 0.1998501176  |
| C  | -1.0691831625 | -2.4681414477 | 0.5333751551  |
| C  | 0.3562616599  | -2.7264508353 | -0.0029730756 |
| O  | -1.6916893963 | -3.2888575437 | 1.1919994708  |
| O  | 0.8885213882  | -3.8399642104 | 0.0038627516  |
| N  | 0.9209811992  | -1.5881379611 | -0.4494713573 |
| H  | -6.1306240883 | 0.8978620222  | -1.1991214644 |

|   |               |               |               |
|---|---------------|---------------|---------------|
| H | -6.5049876316 | -0.8195745767 | -1.2804046406 |
| H | -6.5622278089 | 0.0501081514  | 1.0844411833  |
| H | -5.3656825659 | -1.2234588147 | 0.8707633333  |
| H | -4.3813026326 | 0.6250186657  | 2.2014958461  |
| H | -4.8123161167 | 1.7882436444  | 0.9618608557  |
| H | -2.3743038245 | 0.4021974075  | -1.5915264244 |
| H | -3.5956169851 | 1.6428363003  | -1.3486991678 |
| H | -4.0943069192 | -1.3771695233 | -1.4639315552 |
| H | -4.5207981595 | -0.2113710388 | -2.7118484235 |
| N | 2.2491179432  | -1.6430464802 | -0.9122010547 |
| H | 2.6079822254  | -2.5473512991 | -0.5934426372 |
| H | 2.6617117666  | 0.9072073654  | -1.7703450096 |
| N | -2.259257979  | 1.6157502312  | 0.9647075579  |
| H | -2.6181394437 | 2.5203037224  | 0.6467482493  |
| H | -2.6729595057 | -0.9348616428 | 1.8221329294  |

Daughter fragments shown in Figure S1 (only stable structures, failed searches are omitted).

sCuIII\_CPZmh2-4H\_GeomX1\_Na2\_Geom1 (501 m/z)

|    |          |          |          |
|----|----------|----------|----------|
| 29 | -0.04291 | 0.29069  | -0.47331 |
| 7  | 0.24508  | 2.1015   | -1.1799  |
| 6  | -0.72025 | 2.93816  | -0.79002 |
| 6  | -1.92719 | 2.24293  | -0.22684 |
| 8  | -0.64889 | 4.19384  | -0.79224 |
| 8  | -2.8023  | 2.89452  | 0.37809  |
| 7  | -1.94405 | 0.88595  | -0.38675 |
| 7  | -2.81723 | 0.23872  | 0.39831  |
| 6  | -3.06337 | -1.20692 | 0.25744  |
| 6  | -4.27633 | -1.43524 | -0.67321 |
| 6  | -5.58899 | -0.9154  | -0.07279 |
| 6  | -5.8522  | -1.49552 | 1.32314  |
| 6  | -4.67209 | -1.23304 | 2.26722  |
| 6  | -3.35873 | -1.76358 | 1.67179  |
| 1  | -4.07513 | -0.95085 | -1.63412 |
| 1  | -4.35416 | -2.51428 | -0.85442 |
| 1  | -6.41095 | -1.16515 | -0.74911 |
| 1  | -5.55163 | 0.1776   | -0.01682 |
| 1  | -6.01648 | -2.57743 | 1.24472  |
| 1  | -6.77005 | -1.07069 | 1.73865  |
| 1  | -4.8392  | -1.7161  | 3.23399  |
| 1  | -4.60445 | -0.15818 | 2.47891  |
| 1  | -3.42334 | -2.84915 | 1.56748  |
| 1  | -2.5043  | -1.55833 | 2.32409  |
| 6  | 6.10476  | 0.60509  | 2.01279  |
| 6  | 4.81392  | -0.09677 | 2.44757  |
| 6  | 4.12526  | -0.83634 | 1.27972  |
| 6  | 3.9624   | 0.05671  | 0.07731  |
| 6  | 5.17677  | 0.84973  | -0.33546 |
| 6  | 5.83804  | 1.57205  | 0.85392  |
| 7  | 2.89132  | 0.21819  | -0.61442 |
| 7  | 1.74916  | -0.50808 | -0.32516 |
| 6  | 1.71284  | -1.82424 | -0.54016 |
| 6  | 0.29339  | -2.40195 | -0.52401 |
| 8  | 2.67073  | -2.58516 | -0.80139 |
| 8  | 0.09789  | -3.55836 | -0.94506 |
| 7  | -0.65922 | -1.55321 | -0.0822  |
| 1  | 6.84424  | -0.14374 | 1.70193  |
| 1  | 6.54247  | 1.14186  | 2.85934  |
| 1  | 5.01475  | -0.81191 | 3.25016  |
| 1  | 4.11975  | 0.64582  | 2.85911  |
| 1  | 3.16014  | -1.235   | 1.59307  |
| 1  | 4.73697  | -1.69362 | 0.97308  |
| 1  | 4.90611  | 1.54402  | -1.13336 |



|    |          |          |          |
|----|----------|----------|----------|
| 1  | 5.89914  | 0.14049  | -0.76183 |
| 1  | 5.1818   | 2.38096  | 1.19739  |
| 1  | 6.76667  | 2.04292  | 0.52016  |
| 7  | -1.94101 | -1.92855 | -0.33488 |
| 1  | -2.09578 | -2.25807 | -1.28469 |
| 1  | -2.93368 | 0.63232  | 1.32923  |
| 7  | 1.4275   | 2.64625  | -1.55815 |
| 1  | 2.17687  | 1.9507   | -1.53384 |
| 1  | 1.63196  | 3.53414  | -1.10349 |
| 11 | 2.01502  | -4.60165 | -1.41191 |
| 11 | -2.44838 | 5.10014  | 0.10487  |

Na<sub>2</sub>CuC<sub>16</sub>N<sub>8</sub>H<sub>24</sub>O<sub>4</sub>\_428\_G1

|    |           |           |           |
|----|-----------|-----------|-----------|
| 7  | 1.557758  | -1.370277 | -0.231651 |
| 6  | 2.879973  | -1.511389 | -0.154270 |
| 6  | 3.601270  | -0.282383 | 0.295540  |
| 8  | 3.527441  | -2.549248 | -0.460474 |
| 8  | 4.828193  | -0.279380 | 0.427608  |
| 7  | 2.804563  | 0.837391  | 0.493142  |
| 6  | 2.434740  | 3.096889  | 0.603447  |
| 6  | 3.315075  | 2.043767  | 0.314535  |
| 1  | 4.311775  | 2.206996  | -0.080811 |
| 29 | 0.837259  | 0.479291  | -0.072056 |
| 6  | -4.490044 | -3.208713 | 1.089219  |
| 6  | -3.859410 | -2.001074 | 1.789896  |
| 6  | -3.523872 | -0.857680 | 0.806021  |
| 6  | -2.738488 | -1.358496 | -0.377026 |
| 6  | -3.257749 | -2.607457 | -1.043397 |
| 6  | -3.582138 | -3.724064 | -0.032336 |
| 7  | -1.662161 | -0.843854 | -0.861525 |
| 7  | -1.139496 | 0.328103  | -0.336991 |
| 6  | -1.811716 | 1.477740  | -0.434806 |
| 6  | -0.991259 | 2.704189  | 0.006358  |
| 8  | -2.987568 | 1.658996  | -0.812244 |
| 8  | -1.529149 | 3.806635  | 0.142776  |
| 7  | 0.302984  | 2.384090  | 0.166927  |
| 1  | -5.464805 | -2.926161 | 0.671808  |
| 1  | -4.680969 | -4.003731 | 1.815526  |
| 1  | -4.524488 | -1.613459 | 2.566530  |
| 1  | -2.939657 | -2.316158 | 2.296500  |
| 1  | -2.981619 | -0.062497 | 1.317919  |
| 1  | -4.451504 | -0.415406 | 0.422123  |
| 1  | -2.546894 | -2.937772 | -1.803437 |
| 1  | -4.180530 | -2.331485 | -1.571712 |

|    |           |           |           |
|----|-----------|-----------|-----------|
| 1  | -2.649106 | -4.105998 | 0.398666  |
| 1  | -4.050508 | -4.560698 | -0.557615 |
| 7  | 1.234486  | 3.222919  | 0.674920  |
| 7  | 0.865403  | -2.412749 | -0.742911 |
| 1  | -0.088631 | -2.148438 | -0.995327 |
| 1  | 1.389861  | -2.979495 | -1.405163 |
| 11 | -3.651849 | 3.769264  | -0.586468 |
| 11 | 5.675683  | -2.355493 | -0.020730 |

Na2CuC16N8H24O4\_428\_G2

|    |           |           |           |
|----|-----------|-----------|-----------|
| 7  | 0.389382  | 2.553199  | -0.050111 |
| 6  | 1.745882  | 2.466733  | 0.126649  |
| 6  | 2.241581  | 1.083451  | 0.529949  |
| 8  | 2.539144  | 3.398005  | -0.018859 |
| 8  | 3.459667  | 0.898748  | 0.786243  |
| 7  | 1.280870  | 0.177600  | 0.544879  |
| 7  | 1.558468  | -1.127711 | 0.916075  |
| 6  | 0.755370  | -2.191519 | 0.213148  |
| 6  | 1.248290  | -3.540442 | 0.773796  |
| 6  | 2.659886  | -3.920650 | 0.301096  |
| 6  | 2.771055  | -3.880066 | -1.228135 |
| 6  | 2.324865  | -2.520780 | -1.781617 |
| 6  | 0.905342  | -2.157059 | -1.323085 |
| 1  | 1.202669  | -3.508701 | 1.866820  |
| 1  | 0.538441  | -4.301503 | 0.437426  |
| 1  | 2.896836  | -4.920075 | 0.675432  |
| 1  | 3.409237  | -3.254300 | 0.746481  |
| 1  | 2.141688  | -4.668946 | -1.657790 |
| 1  | 3.797102  | -4.097032 | -1.537708 |
| 1  | 2.352067  | -2.528296 | -2.874678 |
| 1  | 3.032536  | -1.743757 | -1.466040 |
| 1  | 0.187748  | -2.872517 | -1.736546 |
| 1  | 0.621968  | -1.174746 | -1.708899 |
| 29 | -0.472035 | 0.756021  | 0.030970  |
| 6  | -0.204733 | 3.380842  | -0.932171 |
| 6  | -1.576883 | 3.450123  | -0.831220 |
| 7  | -2.489711 | 2.724958  | -0.439234 |
| 7  | -2.267962 | 1.350608  | -0.388849 |
| 6  | -3.248473 | 0.468234  | -0.151510 |
| 6  | -2.666558 | -0.924317 | 0.204520  |
| 8  | -4.469485 | 0.639210  | -0.150227 |
| 8  | -3.434453 | -1.819726 | 0.583377  |
| 7  | -1.328720 | -0.976010 | 0.103770  |
| 1  | 0.353545  | 3.877804  | -1.718719 |
| 7  | -0.653542 | -2.074478 | 0.582198  |

|    |           |           |          |
|----|-----------|-----------|----------|
| 1  | -0.809052 | -2.225315 | 1.578215 |
| 1  | 2.558435  | -1.290511 | 0.809649 |
| 11 | -5.592608 | -1.199811 | 0.456500 |
| 11 | 4.637297  | 2.760619  | 0.615710 |

Na2CuC16N8H24O4\_428\_G3

|    |           |           |           |
|----|-----------|-----------|-----------|
| 7  | -1.965318 | 0.994925  | -0.331073 |
| 6  | -3.279039 | 1.169873  | -0.219148 |
| 6  | -4.170687 | 0.047595  | 0.219592  |
| 8  | -3.848951 | 2.280257  | -0.459915 |
| 8  | -5.373017 | 0.257445  | 0.355511  |
| 7  | -3.703090 | -1.237931 | 0.468471  |
| 6  | -2.175538 | -3.205145 | 0.732211  |
| 6  | -2.799444 | -2.021532 | 0.553613  |
| 1  | -0.430544 | -4.240382 | 0.661561  |
| 29 | -0.675092 | -0.449403 | -0.066505 |
| 6  | 4.297781  | 3.567628  | 1.148942  |
| 6  | 3.629200  | 2.382539  | 1.855406  |
| 6  | 3.530047  | 1.141492  | 0.942089  |
| 6  | 2.915855  | 1.485292  | -0.391524 |
| 6  | 3.480936  | 2.695179  | -1.090863 |
| 6  | 3.568600  | 3.915811  | -0.153922 |
| 7  | 1.946842  | 0.868168  | -0.962281 |
| 7  | 1.377783  | -0.259658 | -0.414943 |
| 6  | 2.065107  | -1.399237 | -0.420852 |
| 6  | 1.228071  | -2.603365 | 0.004001  |
| 8  | 3.264109  | -1.599357 | -0.739946 |
| 8  | 1.721873  | -3.742005 | 0.097815  |
| 7  | -0.073960 | -2.308090 | 0.237782  |
| 1  | 5.343824  | 3.320411  | 0.927659  |
| 1  | 4.317452  | 4.435800  | 1.814020  |
| 1  | 4.178146  | 2.115237  | 2.762791  |
| 1  | 2.621056  | 2.672690  | 2.174454  |
| 1  | 2.966157  | 0.345258  | 1.429641  |
| 1  | 4.536221  | 0.749814  | 0.746255  |
| 1  | 2.888587  | 2.906818  | -1.982674 |
| 1  | 4.493732  | 2.436414  | -1.428218 |
| 1  | 2.555994  | 4.267850  | 0.077568  |
| 1  | 4.074011  | 4.735150  | -0.672429 |
| 7  | -0.889130 | -3.329310 | 0.563369  |
| 7  | -1.304958 | 2.144592  | -0.651433 |
| 1  | -0.398865 | 1.994676  | -1.080738 |
| 1  | -1.906233 | 2.871233  | -1.032273 |
| 11 | 3.888846  | -3.692166 | -0.592027 |
| 11 | -6.001256 | 2.390832  | -0.130082 |

Na2CuC16N8H24O4\_428\_G3b

|    |           |           |           |
|----|-----------|-----------|-----------|
| 7  | 1.763937  | -0.931555 | -0.264431 |
| 6  | 3.063358  | -1.154068 | -0.211140 |
| 6  | 4.016340  | -0.043195 | 0.161388  |
| 8  | 3.581417  | -2.289602 | -0.450366 |
| 8  | 5.212735  | -0.287475 | 0.211480  |
| 7  | 3.583901  | 1.256089  | 0.452552  |
| 6  | 2.050703  | 3.108705  | 0.791761  |
| 6  | 2.434638  | 1.722431  | 0.482249  |
| 1  | 2.804908  | 3.819039  | 1.106337  |
| 29 | 0.748092  | 0.706527  | 0.023849  |
| 6  | -4.109414 | -3.603911 | 1.107831  |
| 6  | -3.565357 | -2.356943 | 1.812788  |
| 6  | -3.402047 | -1.161693 | 0.847257  |
| 6  | -2.629714 | -1.551273 | -0.384975 |
| 6  | -3.063229 | -2.823201 | -1.067759 |
| 6  | -3.220206 | -3.994045 | -0.077887 |
| 7  | -1.625870 | -0.930173 | -0.895563 |
| 7  | -1.191749 | 0.274533  | -0.354020 |
| 6  | -1.978722 | 1.345960  | -0.436852 |
| 6  | -1.286878 | 2.643537  | -0.007061 |
| 8  | -3.167451 | 1.413218  | -0.818880 |
| 8  | -1.903325 | 3.705295  | 0.028144  |
| 7  | 0.025998  | 2.456948  | 0.297765  |
| 1  | -5.129974 | -3.411269 | 0.753487  |
| 1  | -4.177641 | -4.433555 | 1.817173  |
| 1  | -4.222645 | -2.059663 | 2.634576  |
| 1  | -2.591811 | -2.589214 | 2.260036  |
| 1  | -2.923289 | -0.323513 | 1.353945  |
| 1  | -4.389681 | -0.815293 | 0.518616  |
| 1  | -2.364714 | -3.059083 | -1.872674 |
| 1  | -4.036613 | -2.624117 | -1.536268 |
| 1  | -2.231253 | -4.292379 | 0.289616  |
| 1  | -3.633390 | -4.858311 | -0.604781 |
| 7  | 0.819768  | 3.454396  | 0.662652  |
| 7  | 1.010136  | -2.059896 | -0.493611 |
| 1  | 0.126774  | -1.849442 | -0.961153 |
| 1  | 1.578670  | -2.794884 | -0.909123 |
| 11 | -4.005015 | 3.461638  | -0.758603 |
| 11 | 5.745861  | -2.458484 | -0.263892 |

Na2CuC16N8H24O4\_428\_G3c

|    |          |          |           |
|----|----------|----------|-----------|
| 29 | 0.611277 | 0.426770 | -0.236713 |
|----|----------|----------|-----------|

|    |           |           |           |
|----|-----------|-----------|-----------|
| 7  | 2.034763  | -1.054866 | -0.886697 |
| 6  | 3.306796  | -0.820552 | -0.543114 |
| 6  | 3.504134  | 0.441490  | 0.221497  |
| 8  | 4.292640  | -1.566322 | -0.817344 |
| 8  | 4.628218  | 0.807374  | 0.622035  |
| 7  | 2.351528  | 1.140524  | 0.428002  |
| 7  | 2.463135  | 2.290502  | 1.091084  |
| 6  | 1.464499  | 3.116483  | 1.291691  |
| 6  | 0.222685  | 2.922140  | 0.874397  |
| 6  | -2.803689 | -4.093958 | 1.493115  |
| 6  | -2.435413 | -2.741836 | 2.114405  |
| 6  | -2.812870 | -1.557891 | 1.197341  |
| 6  | -2.276238 | -1.750655 | -0.198315 |
| 6  | -2.550561 | -3.094290 | -0.826143 |
| 6  | -2.165321 | -4.257541 | 0.108662  |
| 7  | -1.601131 | -0.907424 | -0.888432 |
| 7  | -1.324167 | 0.366968  | -0.349660 |
| 6  | -2.328585 | 1.224448  | -0.381722 |
| 6  | -2.079502 | 2.700990  | -0.000949 |
| 8  | -3.514474 | 0.972159  | -0.718076 |
| 8  | -2.965581 | 3.512845  | -0.237249 |
| 7  | -0.950230 | 3.133847  | 0.656726  |
| 1  | -3.894679 | -4.171550 | 1.404029  |
| 1  | -2.487203 | -4.906935 | 2.152866  |
| 1  | -2.928815 | -2.615022 | 3.082055  |
| 1  | -1.356459 | -2.713834 | 2.308257  |
| 1  | -2.463570 | -0.615139 | 1.619220  |
| 1  | -3.905420 | -1.491397 | 1.120112  |
| 1  | -2.038793 | -3.156416 | -1.788286 |
| 1  | -3.628392 | -3.147719 | -1.030470 |
| 1  | -1.074000 | -4.292829 | 0.211630  |
| 1  | -2.468199 | -5.204443 | -0.346645 |
| 1  | 3.405459  | 2.509129  | 1.429834  |
| 7  | 1.827409  | -2.208390 | -1.528682 |
| 1  | 0.937727  | -2.277267 | -1.999648 |
| 1  | 2.644134  | -2.679739 | -1.907250 |
| 11 | -4.884182 | 2.621870  | -1.073600 |
| 11 | 6.167818  | -0.738481 | -0.012538 |

Na2CuC16N8H24O4\_417\_G1

|    |           |           |           |
|----|-----------|-----------|-----------|
| 29 | 0.868236  | 0.338862  | -0.096016 |
| 7  | 1.654435  | -1.359375 | -0.572495 |
| 6  | 2.945007  | -1.454951 | -0.216832 |
| 6  | 3.581724  | -0.104043 | 0.180653  |
| 8  | 3.638284  | -2.484432 | -0.172971 |
| 8  | 4.784839  | -0.027985 | 0.412730  |
| 7  | 2.641306  | 0.859985  | 0.233947  |
| 7  | 2.834313  | 2.180111  | 0.570390  |
| 6  | -4.777348 | -2.868838 | 0.999665  |
| 6  | -4.019884 | -1.773315 | 1.756251  |
| 6  | -3.537691 | -0.638546 | 0.824617  |
| 6  | -2.804139 | -1.178374 | -0.373968 |
| 6  | -3.450252 | -2.333723 | -1.094384 |
| 6  | -3.919607 | -3.442542 | -0.132914 |
| 7  | -1.678455 | -0.761163 | -0.841875 |
| 7  | -1.050141 | 0.335208  | -0.273404 |
| 6  | -1.572247 | 1.570998  | -0.310839 |
| 6  | -0.569389 | 2.684559  | 0.104190  |
| 8  | -2.720532 | 1.908851  | -0.644515 |
| 8  | -0.936818 | 3.853791  | 0.176987  |
| 7  | 0.653080  | 2.163413  | 0.322803  |
| 1  | -5.705580 | -2.456789 | 0.584399  |
| 1  | -5.071623 | -3.663911 | 1.690338  |
| 1  | -4.645847 | -1.340945 | 2.541416  |
| 1  | -3.151493 | -2.214778 | 2.259590  |
| 1  | -2.911937 | 0.065550  | 1.373585  |
| 1  | -4.401431 | -0.072804 | 0.453969  |
| 1  | -2.768695 | -2.713433 | -1.857829 |
| 1  | -4.326374 | -1.932941 | -1.622197 |
| 1  | -3.045312 | -3.950456 | 0.292042  |
| 1  | -4.474227 | -4.196428 | -0.697503 |
| 7  | 1.810774  | 2.867028  | 0.564640  |
| 7  | 0.965315  | -2.500111 | -0.891905 |
| 1  | 0.023442  | -2.263590 | -1.198058 |
| 1  | 0.987524  | -3.210773 | -0.164126 |
| 11 | -3.062115 | 4.120222  | -0.520543 |
| 11 | 5.799851  | -2.042086 | 0.224875  |

Na2CuC16N8H24O4\_417\_G2

|    |           |           |           |
|----|-----------|-----------|-----------|
| 29 | -0.391331 | -0.735432 | 0.106187  |
| 7  | 0.259390  | -2.412583 | -0.213960 |
| 6  | 1.594543  | -2.539252 | -0.092654 |
| 6  | 2.245538  | -1.160018 | 0.325918  |
| 8  | 2.307769  | -3.527790 | -0.224471 |

|    |           |           |           |
|----|-----------|-----------|-----------|
| 8  | 3.444337  | -1.139724 | 0.618302  |
| 7  | 1.358393  | -0.149382 | 0.331277  |
| 7  | 1.617567  | 1.128044  | 0.788597  |
| 6  | 0.673964  | 2.174810  | 0.317060  |
| 6  | 0.703268  | 2.268327  | -1.220370 |
| 6  | 2.058647  | 2.746821  | -1.760434 |
| 6  | 2.478527  | 4.078781  | -1.126736 |
| 6  | 2.489931  | 3.984563  | 0.403762  |
| 6  | 1.139474  | 3.499034  | 0.950427  |
| 1  | 0.432767  | 1.308030  | -1.665611 |
| 1  | -0.080930 | 2.975999  | -1.511693 |
| 1  | 1.992856  | 2.846053  | -2.847681 |
| 1  | 2.821327  | 1.988077  | -1.557248 |
| 1  | 1.782342  | 4.867249  | -1.440037 |
| 1  | 3.466122  | 4.374913  | -1.490686 |
| 1  | 2.718380  | 4.958193  | 0.845823  |
| 1  | 3.282027  | 3.300270  | 0.722705  |
| 1  | 0.373159  | 4.253678  | 0.739265  |
| 1  | 1.172362  | 3.386224  | 2.039199  |
| 7  | -1.864112 | -2.918010 | -0.585271 |
| 7  | -1.985761 | -1.589050 | -0.239832 |
| 6  | -3.080371 | -0.792066 | -0.168783 |
| 6  | -2.673831 | 0.667972  | 0.236911  |
| 8  | -4.260159 | -1.076274 | -0.340582 |
| 8  | -3.566469 | 1.513034  | 0.456414  |
| 7  | -1.358328 | 0.833369  | 0.316797  |
| 7  | -0.698901 | 1.917907  | 0.868600  |
| 1  | -1.287497 | 2.746386  | 0.868202  |
| 1  | 1.695156  | 1.144430  | 1.804888  |
| 7  | -0.705440 | -3.357349 | -0.568445 |
| 11 | -5.611045 | 0.689296  | 0.102707  |
| 11 | 4.469128  | -3.118423 | 0.284675  |

Na2CuC16N8H24O4\_385\_G3c

|    |           |           |           |
|----|-----------|-----------|-----------|
| 29 | -0.091832 | -0.169682 | 0.025177  |
| 7  | -1.869245 | 1.067393  | 0.001323  |
| 6  | -2.946673 | 0.301463  | -0.082049 |
| 6  | -2.717369 | -1.212204 | 0.039319  |
| 8  | -4.135169 | 0.707221  | -0.264190 |
| 8  | -3.683741 | -2.006217 | 0.059854  |
| 7  | -1.427186 | -1.555561 | 0.092548  |
| 7  | -1.091710 | -2.881934 | 0.173944  |
| 6  | 0.164970  | -3.265325 | 0.185934  |
| 6  | 1.242265  | -2.528260 | 0.125958  |
| 6  | -1.467324 | 3.366083  | 0.639954  |
| 6  | -0.143649 | 3.963067  | 0.029096  |
| 6  | 0.848212  | 2.914654  | -0.075149 |
| 7  | 1.455836  | 1.935546  | -0.080753 |
| 7  | 1.692885  | 0.629247  | -0.051674 |
| 6  | 3.007257  | 0.270878  | -0.068047 |
| 6  | 3.350269  | -1.233193 | -0.005904 |
| 8  | 3.936160  | 1.085040  | -0.124435 |
| 8  | 4.571524  | -1.496814 | -0.031089 |
| 7  | 2.423002  | -2.182044 | 0.074584  |
| 1  | -1.244401 | 2.941000  | 1.625116  |
| 1  | 0.237500  | 4.762532  | 0.671681  |
| 1  | -0.342591 | 4.375524  | -0.963386 |
| 1  | -1.867684 | -3.540131 | 0.210062  |
| 7  | -2.141477 | 2.430646  | -0.233139 |
| 1  | -2.120938 | 4.228672  | 0.787044  |
| 1  | -3.151052 | 2.569148  | -0.253055 |
| 11 | 6.000865  | 0.162717  | -0.155819 |
| 11 | -5.608173 | -0.916887 | -0.253385 |

Na2CuC16N8H24O4\_385\_G4b

|    |           |           |           |
|----|-----------|-----------|-----------|
| 29 | -0.295365 | -0.272807 | -0.826949 |
| 7  | -0.094692 | 1.539430  | -0.792079 |
| 6  | -0.976001 | 2.454490  | -0.778740 |
| 6  | -2.542179 | 2.146411  | -0.794571 |
| 8  | -0.727765 | 3.728740  | -0.758600 |
| 8  | -3.322570 | 3.078385  | -0.795801 |
| 7  | -3.013189 | 0.830561  | -0.809020 |
| 6  | -2.250952 | -0.171249 | -0.833377 |
| 6  | -2.732186 | -1.566581 | -0.847929 |
| 7  | -1.911815 | -2.564085 | -0.860612 |
| 6  | 2.715704  | 2.743384  | -0.014939 |
| 6  | 3.945463  | 1.969240  | -0.299143 |
| 6  | 3.523271  | 0.588461  | -0.740786 |



|    |           |           |           |
|----|-----------|-----------|-----------|
| 7  | 2.834325  | -0.360238 | -0.843034 |
| 7  | 1.685095  | -1.026482 | -0.819585 |
| 6  | 1.769743  | -2.377016 | -0.859875 |
| 6  | 0.382361  | -3.070441 | -0.866238 |
| 8  | 2.790647  | -3.072647 | -0.882337 |
| 8  | 0.334745  | -4.303845 | -0.879931 |
| 7  | -0.620400 | -2.179878 | -0.859367 |
| 1  | 2.124664  | 2.479924  | 0.852202  |
| 1  | 4.564004  | 1.836520  | 0.591826  |
| 1  | 4.567166  | 2.417907  | -1.077760 |
| 1  | -3.799274 | -1.757803 | -0.853335 |
| 7  | 2.126130  | 3.525690  | -0.910665 |
| 1  | 2.593628  | 3.756835  | -1.776114 |
| 1  | 1.109901  | 3.720853  | -0.849292 |
| 11 | 2.334647  | -5.276996 | -0.929200 |
| 11 | -2.388072 | 5.128863  | -0.741468 |

Na<sub>2</sub>CuC<sub>16</sub>N<sub>8</sub>H<sub>24</sub>O<sub>4</sub>\_385\_G5b

|    |           |           |           |
|----|-----------|-----------|-----------|
| 29 | 0.100260  | -0.350393 | -0.155024 |
| 7  | -1.598794 | 0.668994  | 0.095810  |
| 6  | -2.810756 | 0.130444  | -0.005971 |
| 6  | -3.020339 | -1.396028 | 0.182065  |
| 8  | -3.850545 | 0.794179  | -0.282441 |
| 8  | -4.185512 | -1.791636 | 0.129731  |
| 7  | -2.008123 | -2.285660 | 0.423041  |
| 6  | -0.793048 | -2.142699 | 0.070380  |
| 6  | 0.252269  | -3.148037 | 0.245108  |
| 7  | 1.507571  | -2.848390 | 0.147011  |
| 6  | -1.279991 | 2.979587  | 0.823994  |
| 6  | -0.244997 | 4.052034  | 0.351445  |
| 6  | 0.896965  | 3.273573  | -0.112799 |
| 7  | 1.521191  | 2.310658  | -0.247074 |
| 7  | 1.725438  | 1.026612  | -0.370753 |
| 6  | 2.969962  | 0.511741  | -0.193939 |
| 6  | 2.950878  | -1.030222 | -0.061782 |
| 8  | 4.028806  | 1.134448  | -0.108877 |
| 8  | 4.040152  | -1.615153 | 0.024684  |
| 7  | 1.708286  | -1.513622 | 0.005287  |
| 1  | -0.868728 | 2.427274  | 1.669906  |
| 1  | 0.046191  | 4.720651  | 1.166373  |
| 1  | -0.642495 | 4.660931  | -0.463573 |
| 1  | -0.020528 | -4.192501 | 0.362251  |
| 7  | -1.577088 | 2.046847  | -0.269866 |
| 1  | -2.172748 | 3.509259  | 1.174632  |
| 1  | -2.490595 | 2.257814  | -0.669887 |

|    |           |           |           |
|----|-----------|-----------|-----------|
| 11 | 5.804616  | -0.298794 | 0.058990  |
| 11 | -5.758877 | -0.302766 | -0.342988 |

Na2CuC16N8H24O4\_348\_G1

|    |           |           |           |
|----|-----------|-----------|-----------|
| 29 | 0.081953  | 0.670131  | -0.430770 |
| 7  | 0.425107  | 2.458745  | -0.890375 |
| 6  | -0.786607 | 2.580528  | -0.912324 |
| 8  | -1.876352 | 3.104828  | -1.068606 |
| 6  | 6.324629  | 0.437984  | 1.908676  |
| 6  | 4.980956  | -0.118296 | 2.391202  |
| 6  | 4.185557  | -0.804244 | 1.259558  |
| 6  | 4.080800  | 0.073800  | 0.038921  |
| 6  | 5.359419  | 0.734805  | -0.417050 |
| 6  | 6.125012  | 1.406692  | 0.737764  |
| 7  | 3.018614  | 0.329858  | -0.638737 |
| 7  | 1.809564  | -0.288424 | -0.305769 |
| 6  | 1.635012  | -1.600506 | -0.403669 |
| 6  | 0.144389  | -2.028369 | -0.233424 |
| 8  | 2.499822  | -2.482385 | -0.622765 |
| 8  | -0.110803 | -3.252030 | -0.171951 |
| 7  | -0.736371 | -1.036519 | -0.182246 |
| 1  | 6.972779  | -0.388986 | 1.591818  |
| 1  | 6.840910  | 0.940374  | 2.732035  |
| 1  | 5.130112  | -0.833640 | 3.205102  |
| 1  | 4.379908  | 0.700718  | 2.805198  |
| 1  | 3.192834  | -1.088445 | 1.608123  |
| 1  | 4.690507  | -1.730258 | 0.958657  |
| 1  | 5.135576  | 1.437872  | -1.222155 |
| 1  | 5.995402  | -0.049630 | -0.849611 |
| 1  | 5.564983  | 2.284388  | 1.084465  |
| 1  | 7.087231  | 1.775357  | 0.371214  |
| 1  | -1.689670 | -1.358977 | -0.065695 |
| 7  | 1.617271  | 3.128672  | -1.242887 |
| 1  | 2.333288  | 2.390781  | -1.267615 |
| 1  | 1.849099  | 3.754334  | -0.471746 |
| 11 | 1.649192  | -4.509274 | -0.574060 |
| 11 | -3.844751 | 3.757458  | -1.458647 |

Na2CuC16N8H24O4\_348\_G2

|    |           |           |           |
|----|-----------|-----------|-----------|
| 29 | 0.661927  | 0.546902  | 0.179713  |
| 7  | 1.509006  | -1.231866 | 0.456771  |
| 6  | 2.790074  | -1.210535 | 0.144557  |
| 6  | 3.345824  | 0.199497  | -0.145002 |
| 8  | 3.554922  | -2.212677 | 0.062620  |
| 8  | 4.568797  | 0.330295  | -0.370340 |
| 7  | 2.441682  | 1.171384  | -0.125843 |
| 6  | -4.613537 | -2.542425 | -0.668305 |
| 6  | -3.110424 | -2.389645 | -0.925737 |

|    |           |           |           |
|----|-----------|-----------|-----------|
| 6  | -2.409952 | -1.580520 | 0.190891  |
| 6  | -3.115706 | -0.274542 | 0.418465  |
| 6  | -4.605609 | -0.362379 | 0.641258  |
| 6  | -5.286140 | -1.178072 | -0.478199 |
| 7  | -2.629781 | 0.913094  | 0.420046  |
| 7  | -1.233459 | 1.047395  | 0.210827  |
| 6  | -0.598270 | 2.092848  | 0.036130  |
| 8  | -0.505024 | 3.298931  | -0.123298 |
| 1  | -4.771346 | -3.156547 | 0.227094  |
| 1  | -5.081681 | -3.078128 | -1.498854 |
| 1  | -2.625280 | -3.365593 | -1.001791 |
| 1  | -2.949998 | -1.884654 | -1.885263 |
| 1  | -1.353244 | -1.453307 | -0.032037 |
| 1  | -2.475299 | -2.150143 | 1.127337  |
| 1  | -5.026030 | 0.640776  | 0.723781  |
| 1  | -4.766211 | -0.869978 | 1.601492  |
| 1  | -5.238640 | -0.609862 | -1.414514 |
| 1  | -6.345735 | -1.297648 | -0.237345 |
| 1  | 2.818934  | 2.090718  | -0.320759 |
| 7  | 0.919700  | -2.507485 | 0.619500  |
| 1  | 0.553147  | -2.569261 | 1.566142  |
| 1  | 1.657600  | -3.206853 | 0.523951  |
| 11 | -0.703670 | 5.388045  | -0.292334 |
| 11 | 5.615556  | -1.620327 | -0.389140 |

Na<sub>2</sub>CuC<sub>16</sub>N<sub>8</sub>H<sub>24</sub>O<sub>4</sub>\_348\_G3

|    |           |           |           |
|----|-----------|-----------|-----------|
| 29 | -1.501535 | 0.687656  | 0.964940  |
| 7  | -1.622832 | 2.620848  | 0.138050  |
| 6  | -2.687612 | 2.438410  | -0.417227 |
| 8  | -3.742173 | 2.136974  | -0.858192 |
| 6  | 5.104666  | 0.528874  | 0.431737  |
| 6  | 4.053118  | -0.208588 | 1.267859  |
| 6  | 2.897054  | -0.758302 | 0.403550  |
| 6  | 2.323345  | 0.305889  | -0.496397 |
| 6  | 3.323661  | 1.125293  | -1.273842 |
| 6  | 4.463974  | 1.656912  | -0.384612 |
| 7  | 1.081318  | 0.597638  | -0.644556 |
| 7  | 0.093277  | -0.134349 | 0.027573  |
| 6  | -0.144978 | -1.392865 | -0.304735 |
| 6  | -1.410626 | -1.991574 | 0.377185  |
| 8  | 0.520890  | -2.146284 | -1.063136 |
| 8  | -1.482179 | -3.231060 | 0.466301  |
| 7  | -2.359888 | -1.128378 | 0.818084  |
| 1  | 5.597632  | -0.178794 | -0.246838 |
| 1  | 5.885942  | 0.930679  | 1.083151  |

|    |           |           |           |
|----|-----------|-----------|-----------|
| 1  | 4.509756  | -1.035165 | 1.819575  |
| 1  | 3.642813  | 0.476622  | 2.019397  |
| 1  | 2.116377  | -1.186200 | 1.032963  |
| 1  | 3.270819  | -1.564559 | -0.239918 |
| 1  | 2.805678  | 1.931607  | -1.796948 |
| 1  | 3.754216  | 0.470296  | -2.043399 |
| 1  | 4.068483  | 2.420394  | 0.296646  |
| 1  | 5.210171  | 2.154091  | -1.010226 |
| 1  | -2.991880 | -1.633168 | 1.439674  |
| 7  | -0.444646 | 3.289759  | -0.329291 |
| 1  | 0.198476  | 2.530633  | -0.610166 |
| 1  | -0.048793 | 3.732619  | 0.497047  |
| 11 | 0.116474  | -4.271241 | -0.707177 |
| 11 | -3.899539 | -0.275216 | -0.772289 |

Na<sub>2</sub>CuC<sub>16</sub>N<sub>8</sub>H<sub>24</sub>O<sub>4</sub>\_305 (from 417 m/z)

|    |           |           |           |
|----|-----------|-----------|-----------|
| 7  | -1.682945 | -1.562371 | -0.000890 |
| 6  | -2.824517 | -0.948964 | 0.000003  |
| 6  | -2.569820 | 0.610636  | 0.000741  |
| 8  | -4.001993 | -1.344088 | -0.000197 |
| 8  | -3.477951 | 1.407940  | -0.000297 |
| 7  | -1.216747 | 0.795235  | 0.002479  |
| 7  | -0.614100 | 2.026515  | 0.001039  |
| 29 | 0.000111  | -0.697797 | 0.000770  |
| 7  | 1.682875  | -1.562144 | 0.001492  |
| 6  | 2.824479  | -0.948849 | -0.000311 |
| 6  | 2.569786  | 0.610878  | -0.000730 |
| 8  | 4.001975  | -1.343928 | -0.001278 |
| 8  | 3.477932  | 1.408152  | -0.000511 |
| 7  | 1.216708  | 0.795458  | -0.001213 |
| 7  | 0.613928  | 2.026553  | -0.000192 |
| 11 | 5.547845  | 0.255976  | -0.000335 |
| 11 | -5.547891 | 0.256258  | -0.001600 |

Na<sub>2</sub>CuC<sub>16</sub>N<sub>8</sub>H<sub>24</sub>O<sub>4</sub>\_305\_G1

|    |           |           |           |
|----|-----------|-----------|-----------|
| 29 | -0.220480 | 0.946330  | -0.098307 |
| 7  | -1.944722 | 0.030080  | -0.160679 |
| 6  | -2.976051 | 0.797036  | -0.206262 |
| 8  | -4.186650 | 0.657290  | 0.074575  |
| 7  | 1.311492  | -0.638888 | 0.466356  |
| 6  | 2.558968  | -0.216176 | 0.166724  |
| 6  | 2.617795  | 1.329655  | 0.024588  |
| 8  | 3.568966  | -0.910723 | 0.006386  |
| 8  | 3.765949  | 1.841215  | 0.014161  |
| 7  | 1.455216  | 1.930621  | -0.113739 |
| 1  | 1.575070  | 2.933382  | -0.225382 |
| 11 | 5.401665  | 0.405061  | -0.108267 |
| 11 | -5.904757 | 1.872370  | 0.185154  |
| 7  | 0.969081  | -1.881908 | 0.358849  |
| 6  | 0.276629  | -2.806223 | 0.268502  |
| 1  | -1.388693 | -3.972092 | 0.778203  |
| 1  | -0.780151 | -4.245125 | -0.856185 |
| 6  | -0.967854 | -3.476869 | -0.100537 |
| 1  | -1.508119 | -1.941196 | -1.548630 |
| 1  | -2.868580 | -2.881022 | -0.933894 |
| 6  | -1.937216 | -2.380384 | -0.646476 |
| 7  | -2.163001 | -1.327202 | 0.348740  |
| 1  | -3.117809 | -1.362674 | 0.694127  |

Na2CuC16N8H24O4\_305\_G2

|    |           |           |           |
|----|-----------|-----------|-----------|
| 29 | -0.225464 | -1.407039 | 0.037542  |
| 7  | -1.052028 | 0.663637  | 0.058569  |
| 6  | -2.407399 | 0.548131  | 0.071300  |
| 6  | -2.954574 | -0.825261 | -0.342892 |
| 8  | -3.179938 | 1.463429  | 0.413578  |
| 8  | -4.188414 | -0.910947 | -0.538585 |
| 7  | -2.049616 | -1.780527 | -0.398773 |
| 6  | 0.848875  | 1.943801  | 0.726984  |
| 6  | 1.468090  | 2.134781  | -0.682903 |
| 6  | 2.902746  | 1.888244  | -0.663527 |
| 7  | 4.026988  | 1.642467  | -0.608410 |
| 7  | 1.637158  | -1.397293 | 0.340860  |
| 6  | 2.811676  | -1.464758 | 0.387991  |
| 8  | 4.021061  | -1.501340 | 0.433928  |
| 1  | 1.042787  | 2.815721  | 1.351759  |
| 1  | 1.299391  | 1.063374  | 1.197886  |
| 1  | 1.273084  | 3.137096  | -1.072489 |
| 1  | 1.018632  | 1.412963  | -1.370585 |
| 1  | -2.455715 | -2.689523 | -0.600424 |
| 7  | -0.582846 | 1.768695  | 0.641899  |
| 1  | -1.204879 | 2.263493  | 1.277803  |
| 11 | 5.565446  | -0.069549 | -0.140765 |
| 11 | -5.340954 | 0.866220  | -0.001485 |

Na2CuC16N8H24O4\_290

|    |           |           |           |
|----|-----------|-----------|-----------|
| 29 | 0.085742  | -1.049626 | -0.072893 |
| 7  | -1.665096 | -0.186600 | 0.151712  |
| 6  | -2.748936 | -0.877286 | 0.208366  |
| 8  | -3.960841 | -0.628528 | 0.039620  |
| 6  | -1.439891 | 2.147564  | 0.882039  |
| 6  | -0.677586 | 3.386913  | 0.334171  |
| 6  | 0.566396  | 2.944222  | -0.323911 |
| 7  | 1.168377  | 2.003055  | -0.655339 |
| 7  | 1.544227  | 0.853559  | -1.047760 |
| 6  | 2.508812  | 0.162496  | -0.367747 |
| 6  | 2.016218  | -1.328876 | -0.191649 |
| 8  | 3.508258  | 0.603268  | 0.208277  |
| 8  | 2.891914  | -2.167481 | 0.010503  |
| 1  | -0.796845 | 1.613853  | 1.583763  |
| 1  | -0.448059 | 4.089376  | 1.139925  |
| 1  | -1.280264 | 3.932335  | -0.397804 |
| 7  | -1.801920 | 1.229531  | -0.204283 |
| 1  | -2.310099 | 2.505405  | 1.447512  |
| 1  | -2.767955 | 1.375387  | -0.485195 |
| 11 | 4.839606  | -1.190623 | 0.593920  |
| 11 | -5.791164 | -1.667767 | -0.066597 |



Na2CuC16N8H24O4\_247\_G3

|    |           |           |           |
|----|-----------|-----------|-----------|
| 29 | 0.145982  | -0.690451 | -0.007763 |
| 7  | 2.033366  | -0.405059 | -0.023421 |
| 6  | 3.198855  | -0.279162 | -0.027946 |
| 8  | 4.405554  | -0.132619 | -0.038423 |
| 6  | -0.804906 | 3.595146  | 0.055605  |
| 7  | -0.996156 | 2.436273  | 0.009427  |
| 7  | -1.044380 | 1.119143  | 0.016334  |
| 6  | -2.236099 | 0.494714  | -0.018945 |
| 6  | -1.822392 | -0.988088 | 0.008567  |
| 8  | -3.398192 | 0.902067  | -0.076902 |
| 8  | -2.641760 | -1.869257 | 0.068301  |
| 11 | -4.783330 | -0.871658 | 0.009871  |
| 11 | 6.499618  | -0.052580 | 0.033879  |

Na2CuC16N8H24O4\_247\_G3b

|    |           |           |           |
|----|-----------|-----------|-----------|
| 29 | 0.150481  | -1.292635 | -0.000469 |
| 7  | -1.807062 | -0.441424 | -0.002141 |
| 6  | -3.075253 | -0.690628 | -0.002580 |
| 8  | -4.107977 | -0.033502 | -0.004024 |
| 6  | -1.288280 | 0.851395  | -0.002767 |
| 7  | -0.156683 | 1.213348  | -0.002041 |
| 7  | 0.953327  | 1.835974  | -0.002218 |
| 6  | 2.091871  | 1.107407  | -0.000582 |
| 6  | 1.954481  | -0.515204 | 0.000995  |
| 8  | 3.218682  | 1.605310  | -0.000340 |
| 8  | 3.026920  | -1.089151 | 0.002930  |
| 11 | 4.915046  | 0.204881  | 0.002666  |
| 11 | -6.050405 | 0.781667  | 0.006377  |

Na2CuC16N8H24O4\_243

|    |           |           |           |
|----|-----------|-----------|-----------|
| 29 | 0.324141  | 0.598095  | -1.480384 |
| 7  | -2.860000 | 0.269500  | 0.399180  |
| 6  | -1.967765 | 1.046321  | 0.690018  |
| 8  | -1.300272 | 1.966761  | 1.008230  |
| 7  | -1.530471 | -1.580937 | 0.004956  |
| 7  | -0.493765 | -0.740334 | -0.078819 |
| 6  | 0.652377  | -1.439014 | 0.300001  |
| 6  | 1.956186  | -0.609607 | 0.340698  |
| 8  | 0.571878  | -2.626393 | 0.598282  |
| 8  | 2.923523  | -1.067586 | 0.912673  |
| 7  | 1.869302  | 0.615609  | -0.267740 |
| 1  | 2.809568  | 1.036335  | -0.373108 |
| 7  | -2.737836 | -1.019009 | -0.007599 |
| 1  | -1.157610 | -2.608913 | 0.238616  |
| 1  | -3.622062 | -1.558008 | -0.127901 |
| 11 | 1.039417  | 2.073052  | 1.336899  |

Na2CuC16N8H24O4\_193

|    |           |           |           |
|----|-----------|-----------|-----------|
| 29 | -0.003747 | -0.013712 | -0.048872 |
| 6  | -3.019869 | -0.136309 | -0.001270 |
| 8  | -4.240654 | -0.194148 | 0.022380  |
| 7  | -1.851431 | -0.090298 | -0.022105 |
| 6  | 3.021394  | 0.123879  | -0.014525 |
| 8  | 4.239189  | 0.194847  | 0.002635  |
| 7  | 1.854146  | 0.075349  | -0.026347 |
| 11 | 6.294434  | -0.119006 | 0.081939  |
| 11 | -6.286048 | 0.170940  | 0.068160  |

Na2CuC16N8H24O4\_193

|    |           |           |           |
|----|-----------|-----------|-----------|
| 29 | 0.983351  | -0.236953 | 0.000000  |
| 7  | -0.854671 | -0.083905 | 0.000000  |
| 6  | -2.026802 | 0.007655  | 0.000001  |
| 8  | -3.229470 | 0.101516  | 0.000001  |
| 6  | 4.757121  | 0.943849  | 0.000000  |
| 7  | 3.737767  | 0.250917  | 0.000000  |
| 7  | 2.790335  | -0.507729 | 0.000001  |
| 11 | -5.343397 | 0.248683  | -0.000001 |

Structures shown in Figure 9, used for EXAFS multiple scattering calculations.

sCuIII\_CPZmh2\_-4H\_GeomX1b

|    |              |              |              |
|----|--------------|--------------|--------------|
| 7  | 0.406729000  | 2.132321000  | -1.118510000 |
| 6  | -0.294260000 | 3.048534000  | -0.405367000 |
| 6  | -1.517172000 | 2.427210000  | 0.239074000  |
| 8  | 0.041922000  | 4.219803000  | -0.222641000 |
| 8  | -2.147477000 | 2.972920000  | 1.133757000  |
| 7  | -1.780507000 | 1.151320000  | -0.244729000 |
| 7  | -2.637116000 | 0.462488000  | 0.555380000  |
| 6  | -3.133722000 | -0.818338000 | 0.084362000  |
| 6  | -4.328898000 | -0.580883000 | -0.845532000 |
| 6  | -5.507594000 | 0.051273000  | -0.116800000 |
| 6  | -5.923494000 | -0.772968000 | 1.097110000  |
| 6  | -4.748610000 | -0.975941000 | 2.049102000  |
| 6  | -3.574451000 | -1.616587000 | 1.315974000  |
| 1  | -3.995382000 | 0.061271000  | -1.673160000 |
| 1  | -4.623377000 | -1.553771000 | -1.272954000 |
| 1  | -6.351038000 | 0.165320000  | -0.810924000 |
| 1  | -5.221032000 | 1.061740000  | 0.208310000  |
| 1  | -6.287326000 | -1.759141000 | 0.760908000  |
| 1  | -6.761055000 | -0.289116000 | 1.618001000  |
| 1  | -5.043595000 | -1.609898000 | 2.896500000  |
| 1  | -4.456991000 | -0.004195000 | 2.475255000  |
| 1  | -3.861864000 | -2.613793000 | 0.954856000  |
| 1  | -2.702503000 | -1.761926000 | 1.970006000  |
| 29 | -0.059240000 | 0.345840000  | -0.610444000 |
| 6  | 5.963384000  | -0.337852000 | 1.860911000  |
| 6  | 4.574593000  | -0.845043000 | 2.227396000  |
| 6  | 3.811659000  | -1.373514000 | 1.009061000  |
| 6  | 3.825238000  | -0.385719000 | -0.119079000 |
| 6  | 5.149326000  | 0.246066000  | -0.440322000 |
| 6  | 5.865858000  | 0.759343000  | 0.808046000  |
| 7  | 2.815837000  | -0.012307000 | -0.820186000 |
| 7  | 1.597573000  | -0.615135000 | -0.615561000 |
| 6  | 1.468021000  | -1.937319000 | -0.912611000 |
| 6  | -0.008378000 | -2.339754000 | -0.975965000 |
| 8  | 2.371840000  | -2.729837000 | -1.155786000 |
| 8  | -0.374044000 | -3.357241000 | -1.546098000 |
| 7  | -0.830873000 | -1.416701000 | -0.369258000 |
| 1  | 6.564862000  | -1.172021000 | 1.461703000  |
| 1  | 6.486890000  | 0.029441000  | 2.754472000  |
| 1  | 4.635921000  | -1.633238000 | 2.989517000  |
| 1  | 4.003068000  | -0.018635000 | 2.679231000  |
| 1  | 2.777836000  | -1.617354000 | 1.274018000  |
| 1  | 4.263597000  | -2.310576000 | 0.647690000  |
| 1  | 4.992552000  | 1.038043000  | -1.182595000 |

|   |              |              |              |
|---|--------------|--------------|--------------|
| 1 | 5.780963000  | -0.522939000 | -0.916959000 |
| 1 | 5.305165000  | 1.611220000  | 1.224481000  |
| 1 | 6.861654000  | 1.137947000  | 0.540245000  |
| 7 | -2.157305000 | -1.599090000 | -0.668263000 |
| 1 | -2.325318000 | -1.605702000 | -1.675719000 |
| 1 | -2.386534000 | 0.502075000  | 1.544923000  |
| 7 | 1.633067000  | 2.579595000  | -1.567338000 |
| 1 | 2.266089000  | 1.781215000  | -1.651746000 |
| 1 | 1.996736000  | 3.290656000  | -0.927661000 |

CuII\_CPZ-Dec2019-green-Jul2020

|   |              |              |              |
|---|--------------|--------------|--------------|
| 8 | 0.044855000  | -6.443178000 | 0.532004000  |
| 8 | 1.966763000  | -3.497605000 | 0.416796000  |
| 7 | -0.406381000 | -4.272086000 | 1.141811000  |
| 7 | 2.393194000  | -5.476014000 | -0.634167000 |
| 7 | -1.595830000 | -4.783343000 | 1.656626000  |
| 7 | 3.537391000  | -4.980958000 | -1.228992000 |
| 6 | 0.348625000  | -5.216691000 | 0.617969000  |
| 6 | 1.658496000  | -4.681393000 | 0.116160000  |
| 6 | 4.284959000  | -5.832898000 | -1.856457000 |
| 6 | 5.497114000  | -5.274656000 | -2.523143000 |
| 6 | 6.763662000  | -5.999163000 | -2.041594000 |
| 6 | 6.628190000  | -7.504736000 | -2.216867000 |
| 6 | 5.399020000  | -8.027732000 | -1.487244000 |
| 6 | 4.118150000  | -7.315842000 | -1.968229000 |
| 1 | 5.544666000  | -4.194581000 | -2.348492000 |
| 1 | 5.390106000  | -5.435246000 | -3.607996000 |
| 1 | 7.626720000  | -5.613860000 | -2.594439000 |
| 1 | 6.936060000  | -5.760374000 | -0.981506000 |
| 1 | 7.524471000  | -8.012755000 | -1.844840000 |
| 1 | 6.556459000  | -7.750654000 | -3.287255000 |
| 1 | 5.277494000  | -9.105701000 | -1.638234000 |
| 1 | 5.512660000  | -7.870211000 | -0.404418000 |
| 1 | 3.248121000  | -7.712363000 | -1.429030000 |
| 1 | 3.965605000  | -7.549194000 | -3.033583000 |
| 6 | -2.656100000 | -4.026983000 | 1.686289000  |
| 6 | -2.788611000 | -2.697563000 | 1.028772000  |
| 6 | -3.880754000 | -2.811007000 | -0.059924000 |
| 6 | -5.194713000 | -3.324209000 | 0.509065000  |
| 6 | -4.999187000 | -4.662662000 | 1.203818000  |
| 6 | -3.907596000 | -4.562462000 | 2.286479000  |
| 1 | -1.849016000 | -2.350511000 | 0.588945000  |
| 1 | -3.098971000 | -1.965967000 | 1.788575000  |
| 1 | -4.004820000 | -1.825600000 | -0.521683000 |

|    |              |               |              |
|----|--------------|---------------|--------------|
| 1  | -3.525765000 | -3.486405000  | -0.853550000 |
| 1  | -5.937718000 | -3.416110000  | -0.290550000 |
| 1  | -5.600519000 | -2.593377000  | 1.224389000  |
| 1  | -5.926664000 | -5.012347000  | 1.668668000  |
| 1  | -4.706956000 | -5.430679000  | 0.468504000  |
| 1  | -3.733166000 | -5.517636000  | 2.788987000  |
| 1  | -4.234108000 | -3.842800000  | 3.052700000  |
| 29 | -1.566335000 | -6.781180000  | 1.635539000  |
| 8  | -2.378491000 | -7.256106000  | 3.352683000  |
| 8  | -3.631563000 | -10.372512000 | 4.397162000  |
| 7  | -2.517418000 | -9.262999000  | 2.338688000  |
| 7  | -3.404666000 | -8.463122000  | 5.682558000  |
| 7  | -2.038307000 | -8.675324000  | 1.182498000  |
| 7  | -4.278540000 | -8.765604000  | 6.729778000  |
| 6  | -2.687343000 | -8.477759000  | 3.393716000  |
| 6  | -3.299113000 | -9.208110000  | 4.575266000  |
| 6  | -4.053453000 | -9.841800000  | 7.408878000  |
| 6  | -2.875815000 | -10.756196000 | 7.302528000  |
| 6  | -2.301237000 | -11.090489000 | 8.686688000  |
| 6  | -3.379390000 | -11.576378000 | 9.644281000  |
| 6  | -4.474014000 | -10.528978000 | 9.787280000  |
| 6  | -5.090520000 | -10.191454000 | 8.426670000  |
| 1  | -2.103868000 | -10.332540000 | 6.650633000  |
| 1  | -3.231511000 | -11.679858000 | 6.818601000  |
| 1  | -1.510765000 | -11.839914000 | 8.566607000  |
| 1  | -1.820581000 | -10.192615000 | 9.104160000  |
| 1  | -2.938971000 | -11.804565000 | 10.621275000 |
| 1  | -3.811648000 | -12.517791000 | 9.270945000  |
| 1  | -5.265385000 | -10.871939000 | 10.462085000 |
| 1  | -4.055987000 | -9.615358000  | 10.235987000 |
| 1  | -5.827578000 | -9.384369000  | 8.485701000  |
| 1  | -5.615029000 | -11.082635000 | 8.044280000  |
| 6  | -1.993069000 | -9.367943000  | 0.084196000  |
| 6  | -1.466959000 | -8.722421000  | -1.148773000 |
| 6  | -0.201085000 | -9.472000000  | -1.605192000 |
| 6  | -0.486802000 | -10.956937000 | -1.788071000 |
| 6  | -1.063109000 | -11.565889000 | -0.518314000 |
| 6  | -2.332454000 | -10.811655000 | -0.056189000 |
| 1  | -1.273817000 | -7.657212000  | -0.989918000 |
| 1  | -2.236747000 | -8.816095000  | -1.929178000 |
| 1  | 0.159033000  | -9.020604000  | -2.536821000 |
| 1  | 0.585516000  | -9.329735000  | -0.846076000 |
| 1  | 0.428720000  | -11.487596000 | -2.071267000 |
| 1  | -1.192433000 | -11.096048000 | -2.620310000 |
| 1  | -1.329506000 | -12.617232000 | -0.666368000 |
| 1  | -0.316731000 | -11.542474000 | 0.289278000  |

|    |              |               |              |
|----|--------------|---------------|--------------|
| 1  | -2.749963000 | -11.274738000 | 0.841740000  |
| 1  | -3.099859000 | -10.896832000 | -0.839628000 |
| 8  | 4.465130000  | 2.127183000   | 0.700023000  |
| 8  | 5.937243000  | 5.318058000   | 0.775811000  |
| 7  | 4.719826000  | 3.639797000   | 2.344964000  |
| 7  | 6.028577000  | 3.776556000   | -0.948506000 |
| 7  | 4.048403000  | 2.779029000   | 3.195979000  |
| 7  | 6.362883000  | 4.604736000   | -2.025225000 |
| 6  | 4.921462000  | 3.231331000   | 1.102488000  |
| 6  | 5.698818000  | 4.231886000   | 0.265924000  |
| 6  | 7.486248000  | 5.239176000   | -1.974862000 |
| 6  | 7.754554000  | 6.184480000   | -3.099104000 |
| 6  | 8.047078000  | 7.584066000   | -2.537964000 |
| 6  | 9.181215000  | 7.539276000   | -1.523164000 |
| 6  | 8.860321000  | 6.573826000   | -0.389160000 |
| 6  | 8.548113000  | 5.166352000   | -0.927070000 |
| 1  | 6.909270000  | 6.184496000   | -3.793847000 |
| 1  | 8.642814000  | 5.825980000   | -3.642384000 |
| 1  | 8.284280000  | 8.258468000   | -3.367528000 |
| 1  | 7.136259000  | 7.978186000   | -2.062426000 |
| 1  | 9.367807000  | 8.540442000   | -1.118730000 |
| 1  | 10.112050000 | 7.229120000   | -2.022851000 |
| 1  | 9.694972000  | 6.504231000   | 0.317410000  |
| 1  | 7.989642000  | 6.935881000   | 0.175823000  |
| 1  | 8.289382000  | 4.472971000   | -0.120837000 |
| 1  | 9.450169000  | 4.773995000   | -1.422999000 |
| 6  | 3.969681000  | 3.084505000   | 4.456575000  |
| 6  | 4.433982000  | 4.358709000   | 5.076373000  |
| 6  | 3.192618000  | 5.086698000   | 5.644106000  |
| 6  | 2.438040000  | 4.204927000   | 6.628001000  |
| 6  | 2.048978000  | 2.874436000   | 5.995481000  |
| 6  | 3.274499000  | 2.161207000   | 5.394605000  |
| 1  | 4.996177000  | 5.020058000   | 4.412453000  |
| 1  | 5.107698000  | 4.102795000   | 5.906677000  |
| 1  | 3.530124000  | 6.012982000   | 6.119903000  |
| 1  | 2.536129000  | 5.383308000   | 4.812720000  |
| 1  | 1.545340000  | 4.728536000   | 6.987979000  |
| 1  | 3.064493000  | 4.019355000   | 7.512806000  |
| 1  | 1.591394000  | 2.212204000   | 6.740978000  |
| 1  | 1.305590000  | 3.038042000   | 5.195633000  |
| 1  | 3.000211000  | 1.222755000   | 4.907178000  |
| 1  | 3.981275000  | 1.928318000   | 6.204839000  |
| 29 | 3.318655000  | 1.282173000   | 2.030446000  |
| 8  | 1.715959000  | 0.875507000   | 3.063701000  |
| 8  | -0.548088000 | -1.806171000  | 2.805148000  |
| 7  | 1.468171000  | -0.783449000  | 1.490415000  |

|    |              |               |              |
|----|--------------|---------------|--------------|
| 7  | -0.654687000 | 0.009191000   | 4.188475000  |
| 7  | 2.658895000  | -0.302267000  | 0.937776000  |
| 7  | -1.901226000 | -0.327872000  | 4.691244000  |
| 6  | 1.116500000  | -0.129912000  | 2.574992000  |
| 6  | -0.109674000 | -0.701095000  | 3.224478000  |
| 6  | -2.193713000 | 0.164995000   | 5.852403000  |
| 6  | -1.327736000 | 0.995749000   | 6.742484000  |
| 6  | -1.955671000 | 2.394129000   | 6.898772000  |
| 6  | -3.393388000 | 2.282586000   | 7.393580000  |
| 6  | -4.227704000 | 1.391226000   | 6.482133000  |
| 6  | -3.595296000 | -0.006204000  | 6.324770000  |
| 1  | -0.283274000 | 1.046966000   | 6.411194000  |
| 1  | -1.310091000 | 0.506413000   | 7.727741000  |
| 1  | -1.344509000 | 2.985967000   | 7.590562000  |
| 1  | -1.933284000 | 2.914647000   | 5.927057000  |
| 1  | -3.844228000 | 3.278525000   | 7.461894000  |
| 1  | -3.394534000 | 1.873411000   | 8.415102000  |
| 1  | -5.245375000 | 1.278995000   | 6.870110000  |
| 1  | -4.321158000 | 1.853905000   | 5.488006000  |
| 1  | -4.156232000 | -0.628224000  | 5.620399000  |
| 1  | -3.587281000 | -0.508360000  | 7.303603000  |
| 6  | 2.915379000  | -0.601089000  | -0.308222000 |
| 6  | 1.930850000  | -1.147919000  | -1.286017000 |
| 6  | 1.884693000  | -0.217096000  | -2.516897000 |
| 6  | 3.261130000  | -0.061174000  | -3.143375000 |
| 6  | 4.242659000  | 0.499267000   | -2.125769000 |
| 6  | 4.277230000  | -0.361868000  | -0.854418000 |
| 1  | 0.932138000  | -1.254747000  | -0.849746000 |
| 1  | 2.280735000  | -2.140865000  | -1.603028000 |
| 1  | 1.166325000  | -0.635496000  | -3.230180000 |
| 1  | 1.492237000  | 0.766973000   | -2.220487000 |
| 1  | 3.205307000  | 0.596917000   | -4.017111000 |
| 1  | 3.616580000  | -1.036851000  | -3.508818000 |
| 1  | 5.254681000  | 0.562456000   | -2.541638000 |
| 1  | 3.932927000  | 1.520038000   | -1.852562000 |
| 1  | 4.948302000  | 0.041132000   | -0.092807000 |
| 1  | 4.648272000  | -1.368156000  | -1.117183000 |
| 29 | 0.583762000  | -2.570401000  | 1.418994000  |
| 1  | 5.084877000  | 4.558243000   | 2.610342000  |
| 1  | -2.830243000 | -10.234969000 | 2.414235000  |
| 1  | -0.197538000 | 0.890686000   | 4.433534000  |
| 1  | 2.062418000  | -6.431948000  | -0.784384000 |
| 1  | 5.619465000  | 2.895157000   | -1.242506000 |
| 1  | -3.206206000 | -7.470701000  | 5.603386000  |

## References used in Supporting Information.

---

<sup>i</sup> QPOWG and GPLOTN are © GN George.

<sup>ii</sup> Pushie MJ, Nienaber KH, Summers KL, Cotelesage JJ, Ponomarenko O, Nichol HK, Pickering IJ, George GN. (2014) The solution structure of the copper clioquinol complex. *J Inorg Biochem.* 133:50-56.
